# Supplementary material for: Deprotection of oximes, imines, and azines to the corresponding carbonyls using Cu-nanoparticles on cellulose template as green reusable catalyst
Source: Royal Society of Chemistry journal article supplement (doi:10.1039/c4ra08803d), 2014-01-01
Supplement: c4ra08803d1.pdf [file c4ra08803d1.pdf]

## Supporting Information

### Deprotection of oximes, imines, and azines to the corresponding carbonyls using Cu-nano particles on cellulose template as green reusable catalyst

Diganta Baruah,<sup>a</sup> Ujwal Pratim Saikia,<sup>a</sup> Pallab Pahari,<sup>a\*</sup> Dipak Kumar Dutta<sup>b</sup> and Dilip  
Konwar<sup>a\*</sup>

a. Synthetic Organic Chemistry Division, CSIR-North East Institute of Science and  
Technology, Jorhat, Assam, India, 785006.

b. Materials Science Division, CSIR-North East Institute of Science and Technology, Jorhat,  
Assam, India, 785006.

Email: [ppahari@gmail.com](mailto:ppahari@gmail.com), [dkonwar@yahoo.co.uk](mailto:dkonwar@yahoo.co.uk)

#### Table of Contents

|                    |     |
|--------------------|-----|
| Experimental ..... | S2  |
| Spectra .....      | S11 |

## Experimental

**General Methods.** Chromatographic separations were performed using silica gel 60-120. Infrared (IR) spectra were recorded using an FT-IR spectrometer as chloroform solutions on sodium chloride disks. NMR spectra were recorded in Bruker Avance DPX 300 MHz and Avance-III 500 MHz FTNMR spectrometer using tetramethylsilane (TMS) as an internal standard in indicated solvent. All microwave irradiation experiments were carried out in a CEM-Discover LabMate system (standard configuration, temperature control, external IR temperature sensor, fixed hold time).

### **Preparation of Cu-nano particle using $\text{NaBH}_4$ reduction method:**

To a suspension of standard cellulose (200 mg) in water (20 mL), copper(II) acetate (50 mg) was added. The mixture was stirred for 30 minutes at room temperature and then cooled to 0 °C.  $\text{NaBH}_4$  (20 mg) was added slowly portion wise under nitrogen atmosphere when the solution turned black. The whole mixture was stirred at that temperature for another 1 hour. The black suspension was filtered, washed, vacuum dried, and finally stored under  $\text{N}_2$  atmosphere.

### **Preparation of Cu-nano particle using hydrazine hydrate/ NaOH reduction method**

To a suspension of standard cellulose (200 mg) in water (20 mL), copper(II) acetate (50 mg) was added and the mixture was stirred for 30 minutes at room temperature. NaOH (10%) solution and Hydrazine Hydrate was added to the above suspension until the pH value exceeds 10. The resulting solution was kept in a thermostatic bath (50-60 °C) for 3-4 h. The black suspension was then filtered, washed and vacuum dried and finally stored under  $\text{N}_2$  atmosphere.

### **General procedure for deprotection of oximes/imines/azines**

In a 10 mL microwave reaction vial oxime/imine/azine (1 mmol),  $\text{H}_2\text{O}$  (5 mL), and Cu-nano catalyst (20 mol%) were taken. The mixture was heated under microwave at 80–100 °C for 5-10 min. After the completion of the reaction, as checked by TLC, the catalyst was filtered while washing with ethyl acetate. The filtrate was extracted with ethyl acetate (2 × 20 mL).

The organic layer was washed with brine (15 mL), dried over anhydrous  $\text{Na}_2\text{SO}_4$ , concentrated, and purified by column chromatography.

#### General procedure for preparation of oximes:

To a solution of aldehyde/ketone (1 mmol) in ethanol (5 mL), hydroxylamine (1.5 mmol) and pyridine (0.5 mL) was added. The mixture was heated on a water bath at 70-80 °C for 30 minutes to 3 hours. After this, the reaction was cooled in an ice bath when crystals of oximes separated. Filtration and washing with 70% cold ethanol provided oxime. Further purification was done by recrystallization from ethanol (95%).

#### General procedure for preparation of imines and azines:

A mixture of aldehyde (1 mmol), amine (1 mmol), and ethanol (5 mL) was warmed in a water bath for 2-5 minutes and then cooled in an ice bath when crystals of imines/azines separated. Filtration, washing with 70% ethanol and recrystallization from ethanol (95%) provided pure imines/azines.

#### Characterization of aldehydes:

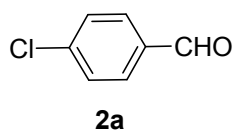

**4-Chlorobenzaldehyde (2a).** Semi solid;  $R_f$ : 0.6 (1:20 :: Ethyl acetate:Hexane); IR (KBr):  $\text{cm}^{-1}$  1699, 1589, 1386, 1207, 1094;  $^1\text{H}$  NMR ( $\text{CDCl}_3$ , 300 MHz):  $\delta$  9.99 (s, 1H), 7.84 (d, 2H,  $J$  = 8.4 Hz), 7.52 (d, 2H,  $J$  = 8.4 Hz).

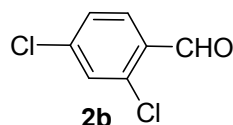

**2, 4-Dichlorobenzaldehyde (2b).** Solid; Mp: 68-70 °C (lit.<sup>1</sup> 71-72 °C);  $R_f$ : 0.75 (1:20 :: Ethyl acetate:Hexane); IR (KBr):  $\text{cm}^{-1}$  1678, 1584, 1375, 1199, 1047;  $^1\text{H}$  NMR ( $\text{CDCl}_3$ , 300 MHz):  $\delta$  10.42(s, 1H), 7.87 (d, 2H,  $J$  = 8.4), 7.49(s, 1H), 7.38 (d, 2H,  $J$  = 8.4).

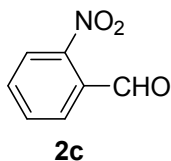

**2-Nitrobenzaldehyde (2c).** Semi solid;  $R_f$ : 0.6 (1:10 :: Ethyl acetate:Hexane); IR (KBr):  $\text{cm}^{-1}$  1694, 1524, 1344, 1188;  $^1\text{H}$  NMR ( $\text{CDCl}_3$ , 500 MHz):  $\delta$  10.43 (s, 1H), 8.13 (dd, 1H,  $J = 8.0$ , 1.5 Hz), 7.96 (d, 1H,  $J = 8.0$ , 1.5 Hz), 7.88-7.71 (m, 2H).

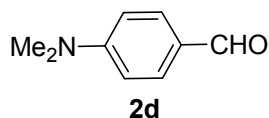

**4-(Dimethyl)aminobenzaldehyde (2d).** Solid; Mp: 70-72 °C (lit.<sup>2</sup> 70-72 °C);  $R_f$ : 0.4 (1:10 :: Ethyl acetate:Hexane); IR (KBr):  $\text{cm}^{-1}$  1661, 1598, 1375, 1231, 1170, 1065;  $^1\text{H}$  NMR ( $\text{CDCl}_3$ , 300 MHz):  $\delta$  9.74(s, 1H), 7.75 (d, 2H,  $J = 8.7$ ), 6.72 (d, 2H,  $J = 8.7$  Hz), 3.087(s, 6H).

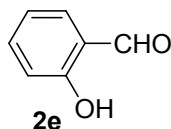

**Salicylaldehyde (2e).** Oil;  $R_f$ : 0.6 (1:20 :: Ethyl acetate:Hexane); IR (KBr):  $\text{cm}^{-1}$  3062, 1664, 1580, 1459, 1386, 1278, 1150, 1029;  $^1\text{H}$  NMR ( $\text{CDCl}_3$ , 300 MHz):  $\delta$  11.02 (s, 1H), 9.89 (s, 1H), 7.58 -7.50 (m, 2H), 7.05-6.96 (m, 2H).

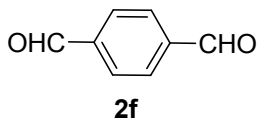

**Benzene-1,4-dicarbaldehyde (2f).** Solid; Mp: 110-112 °C (lit.<sup>3</sup> 113-114 °C);  $R_f$ : 0.5 (1:5 :: Ethyl acetate:Hexane); IR (KBr):  $\text{cm}^{-1}$  1692, 1497, 1384, 1301, 1199, 1013;  $^1\text{H}$  NMR ( $\text{CDCl}_3$ , 300 MHz):  $\delta$  10.14 (s, 2H), 8.06 (s, 4H).

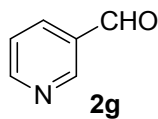

**Pyridine-3-aldehyde (2g).** Oil;  $R_f$  0.3 (1:10 :: Ethyl acetate:Hexane); IR (KBr):  $\text{cm}^{-1}$  1704, 1590, 1428, 1216, 1026;  $^1\text{H}$  NMR ( $\text{CDCl}_3$ , 300 MHz):  $\delta$  10.14 (s, 1H), 9.10 (s, 1H), 8.86 (d, 1H,  $J = 8.0$  Hz), 8.21 (d, 1H,  $J = 8.0$  Hz), 7.54-7.44 (m, 1H).

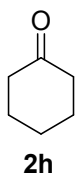

**Cyclohexanone (2h).** Oil;  $R_f$  0.7 (1:20 :: Ethyl acetate:Hexane); IR (KBr):  $\text{cm}^{-1}$  1714, 1450, 1311, 1222, 1119;  $^1\text{H}$  NMR ( $\text{CDCl}_3$ , 300 MHz):  $\delta$  2.38-2.28 (m, 4H), 1.91-1.83 (m, 4H), 1.75-1.68 (m, 2H).

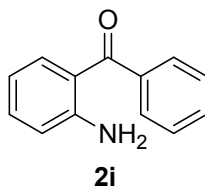

**(2-Aminophenyl)(phenyl)methanone (2i).** Solid; Mp: 101-103 °C (lit.<sup>4</sup> 103-104 °C);  $R_f$  0.65 (1:10 :: Ethyl acetate:Hexane); IR (KBr):  $\text{cm}^{-1}$  3470, 3349, 1615, 1548, 1303, 1248, 1160;  $^1\text{H}$  NMR ( $\text{CDCl}_3$ , 300 MHz):  $\delta$  7.66 (d, 2H,  $J = 8.0$  Hz), 7.58-7.45 (m, 4H), 7.32 (t, 1H,  $J = 8.0$  Hz), 6.76 (d, 1H,  $J = 8.0$  Hz), 6.62 (t, 1H,  $J = 8.0$  Hz), 6.12 (s, 2H).

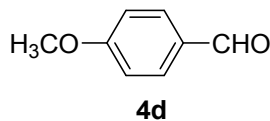

**4-Methoxy benzaldehyde (4d).** Oil;  $R_f$  0.35 (1:20 :: Ethyl acetate:Hexane); IR (KBr):  $\text{cm}^{-1}$  1694, 1601, 1513, 1316, 1182, 1025;  $^1\text{H}$  NMR ( $\text{CDCl}_3$ , 500 MHz):  $\delta$  9.88 (s, 1H), 7.84 (d, 1H,  $J = 7.5$  Hz), 7.02 (d, 1H,  $J = 7.5$  Hz), 3.86 (s, 3H).

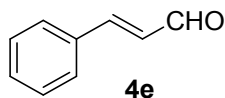

**Cinnamaldehyde (4e).** Oil;  $R_f$ : 0.3 (1:20 :: Ethyl acetate:Hexane); IR (KBr):  $\text{cm}^{-1}$  1678, 1626, 1450, 1127, 973;  $^1\text{H}$  NMR ( $\text{CDCl}_3$ , 500 MHz):  $\delta$  9.88 (d, 1H,  $J$  = 8.0 Hz), 7.98-7.52 (m, 2H), 7.48-7.40 (m, 4H), 6.71 (dd, 1H,  $J$  = 16.0, 8.0 Hz).

**Characterization of oximes:**

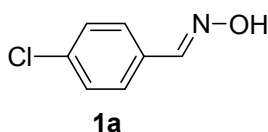

**4-Chlorobenzaldehyde oxime (1a).**  $^1\text{H}$  NMR ( $\text{CDCl}_3$ , 300 MHz):  $\delta$  8.12(s, 1H), 7.52 (d, 2H,  $J$  = 9.0 Hz), 7.36 (d, 2H,  $J$  = 9.0 Hz).

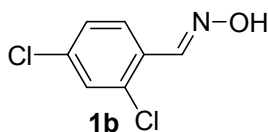

**2, 4-Dichlorobenzaldehyde oxime (1b).**  $^1\text{H}$  NMR ( $\text{CDCl}_3$ , 300 MHz):  $\delta$  8.28(s, 1H), 7.78 (d, 1H,  $J$  = 7.5 Hz), 7.42 (s, 1H), 7.25 (d, 1H,  $J$  = 7.5 Hz).

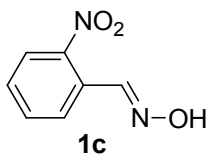

**2-Nitro benzaldehyde oxime (1c).**  $^1\text{H}$  NMR ( $\text{CDCl}_3$ , 300 MHz):  $\delta$  8.69(s, 1H), 8.07 (d, 1H,  $J$  = 7.0 Hz), 7.92 (d, 1H,  $J$  = 7.0 Hz), 7.71-7.53 (m, 2H).

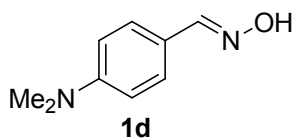

**4-(Dimethylamino)benzaldehyde oxime (1d).**  $^1\text{H}$  NMR ( $\text{CDCl}_3$ , 500 MHz):  $\delta$  8.06 (s, 1H), 7.44 (d, 2H,  $J$  = 8.5 Hz), 6.68 (d, 2H,  $J$  = 8.5 Hz), 2.99 (s, 6H).

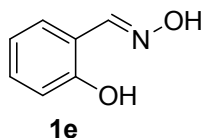

**2-Hydroxybenzaldehyde oxime (1e).**  $^1\text{H}$  NMR ( $\text{DMSO}-d_6$ , 500 MHz):  $\delta$  8.33 (s, 1H), 7.48 (d, 1H,  $J$  = 8.0 Hz), 7.28-7.18 (m, 1H), 6.98-6.75 (m, 2H).

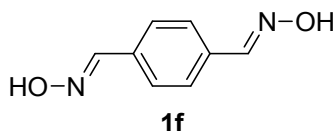

**Benzene-1,4-dicarbaldehyde oxime (1f).**  $^1\text{H}$  NMR ( $\text{MeOH}-d_6$ , 300 MHz):  $\delta$  11.35 (s, 2H), 8.15 (s, 2H), 7.61 (s, 4H).

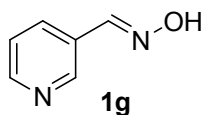

**Nicotinaldehyde oxime (1g).**  $^1\text{H}$  NMR ( $\text{DMSO}-d_6$ , 500 MHz):  $\delta$  9.01 (s, 1H), 8.89-8.82 (m, 1H), 8.66-8.58 (m, 1H), 8.34 (s, 1H), 7.99-7.94 (m, 1H).

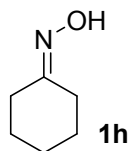

**Cyclohexanone oxime (1h).**  $^1\text{H}$  NMR ( $\text{CDCl}_3$ , 500 MHz):  $\delta$  2.52 (t, 2H,  $J$  = 6.5 Hz), 2.22 (t, 2H,  $J$  = 5.5 Hz), 1.72-1.55 (m, 6H).

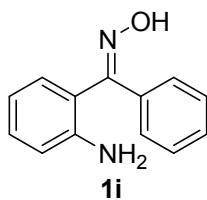

**(2-Aminophenyl)(phenyl)methanone oxime (1i).**  $^1\text{H}$  NMR ( $\text{CDCl}_3$ , 500 MHz):  $\delta$  7.63 (d, 2H,  $J = 7.0$  Hz), 7.54-7.41 (m, 4H), 7.29 (t, 1H,  $J = 7.0$  Hz), 6.73 (d, 1H,  $J = 8.0$  Hz), 6.60 (t, 1H,  $J = 7.0$  Hz)

**Characterization of imines:**

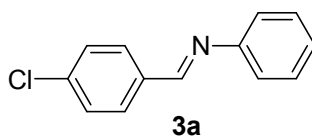

**4-Chlorobenzylidene-phenylamine (3a).**  $^1\text{H}$  NMR ( $\text{CDCl}_3$ , 300 MHz):  $\delta$  8.42 (s, 1H), 7.84 (d, 2H,  $J = 8.3$  Hz), 7.49-7.34 (m, 4H), 7.28-7.18 (m, 3H).

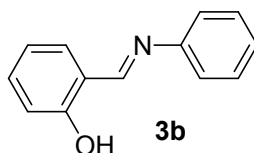

**2-Phenyliminomethyl-phenol (3b).**  $^1\text{H}$  NMR ( $\text{CDCl}_3$ , 300 MHz):  $\delta$  13.28 (s, 1H), 8.62 (s, 1H), 7.55-7.25 (m, 5H), 7.03 (d, 1H,  $J = 8.4$  Hz), 6.95 (t, 1H,  $J = 7.5$  Hz).

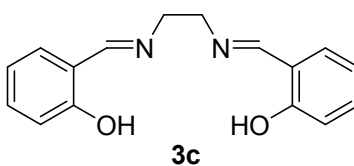

**SalenH<sub>2</sub> (3c).**  $^1\text{H}$  NMR ( $\text{CDCl}_3$ , 300 MHz):  $\delta$  13.23 (s, 2H), 8.36 (s, 2H), 7.32-7.21 (m, 4H), 6.95-6.82 (m, 4H), 3.93 (s, 4H).



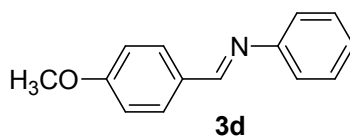

**4-Methoxybenzylidenephénylamine (3d).**  $^1\text{H}$  NMR ( $\text{CDCl}_3$ , 300 MHz):  $\delta$  8.38 (s, 1H), 7.84 (d, 2H,  $J$  = 8.7 Hz), 7.43-7.35 (m, 2H), 7.24-7.18 (m, 3H), 6.97 (d, 2H,  $J$  = 8.6 Hz), 3.87 (s, 3H).

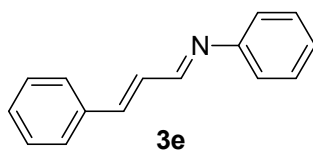

**Phenyl-(3-phenyl-allylidene)-amine (3e).**  $^1\text{H}$  NMR ( $\text{CDCl}_3$ , 300 MHz):  $\delta$  8.27 (d, 1H,  $J$  = 6.4 Hz), 7.54 (d, 2H,  $J$  = 7.8 Hz), 7.53-7.33 (m, 5H), 7.25-7.07 (m, 5H).

#### Characterization of azines:

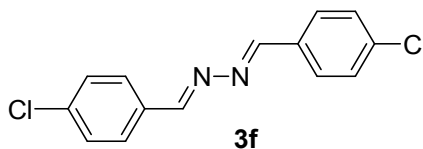

**N,N'-Bis-(4-chlorobenzylidene)-hydrazine (3f).**  $^1\text{H}$  NMR ( $\text{CDCl}_3$ , 300 MHz):  $\delta$  8.61 (s, 2H), 7.77 (d, 4H,  $J$  = 8.4 Hz), 7.42 (d, 4H,  $J$  = 8.4 Hz).

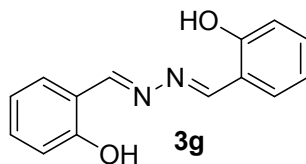

**N,N'-Bis-(2-hydroxybenzylidene)-hydrazine (3g).**  $^1\text{H}$  NMR ( $\text{CDCl}_3$ , 300 MHz):  $\delta$  11.28 (brs, 2H), 8.64 (s, 2H), 7.37-7.26 (m, 4H), 7.04-6.85 (m, 4H).

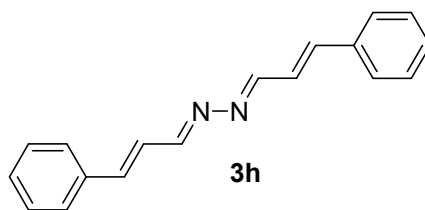

**N,N'-Bis-(3-phenylallylidene)-hydrazine (3h).**  $^1\text{H}$  NMR ( $\text{CDCl}_3$ , 300 MHz):  $\delta$  8.43-8.32 (m, 2H), 7.53-7.50 (m, 4H), 7.44-7.33 (m, 6H), 7.09-7.07 (m, 4H)

## References:

1. X. R. Lianga, F. Shia, R. E. Chena, and W. K. Su, *Org. Prep. Proc. Int.*, 2010, **42**, 379.
2. R. Trotzki, M. M. Hoffmann, and B. Ondruschka, *Green Chem.*, 2008, **10**, 767.
3. G. Pelletier , W. S. Bechara , and A. B. Charette , *J. Am. Chem. Soc.*, 2010, **132**, 12817–12819.
4. B. Zhao, and X. Lu, *Tetrahedron Lett.*, 2006, **47**, 6765.

# Spectra:

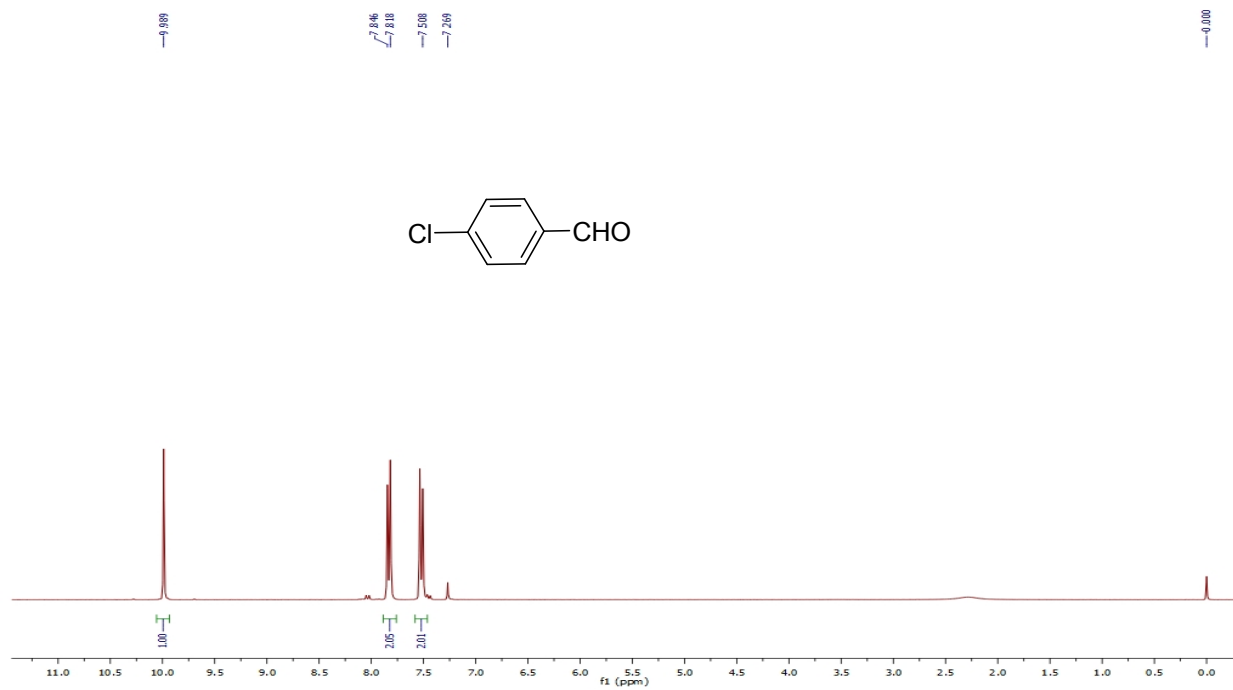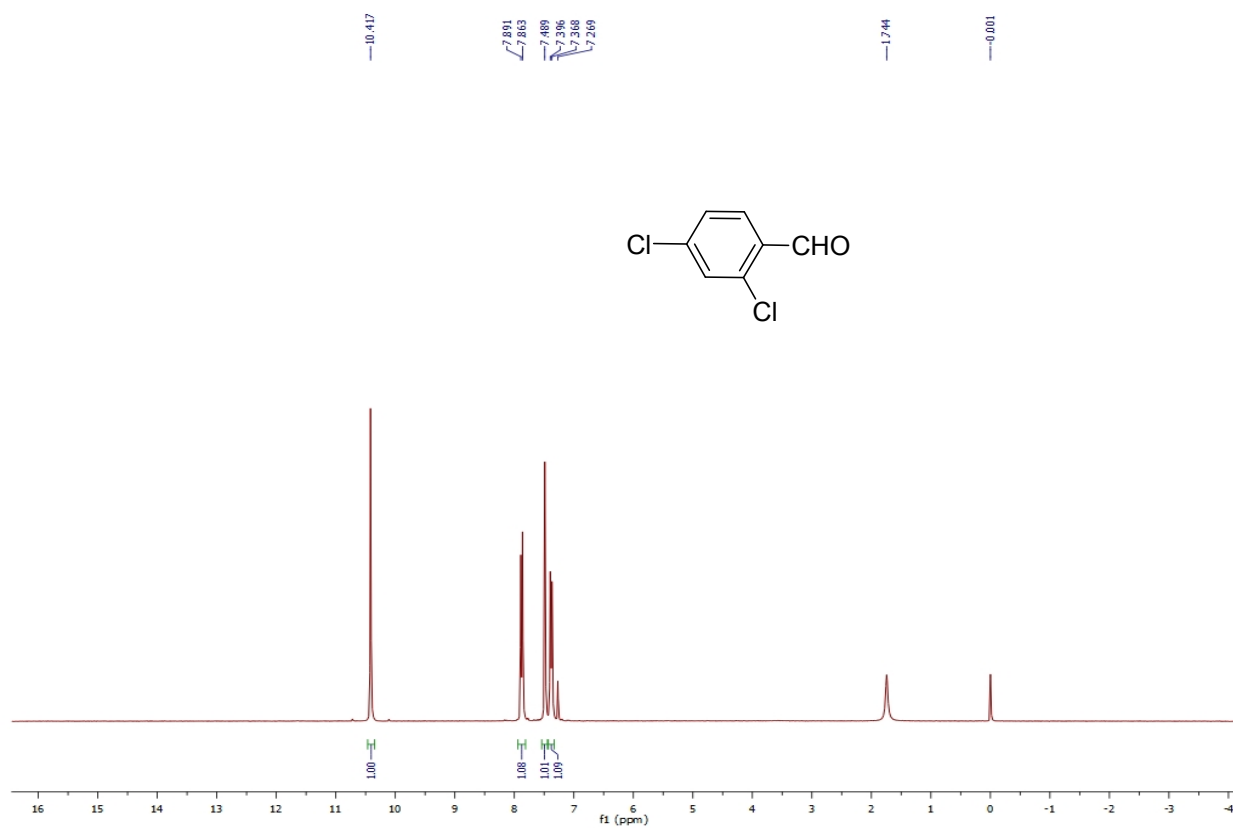

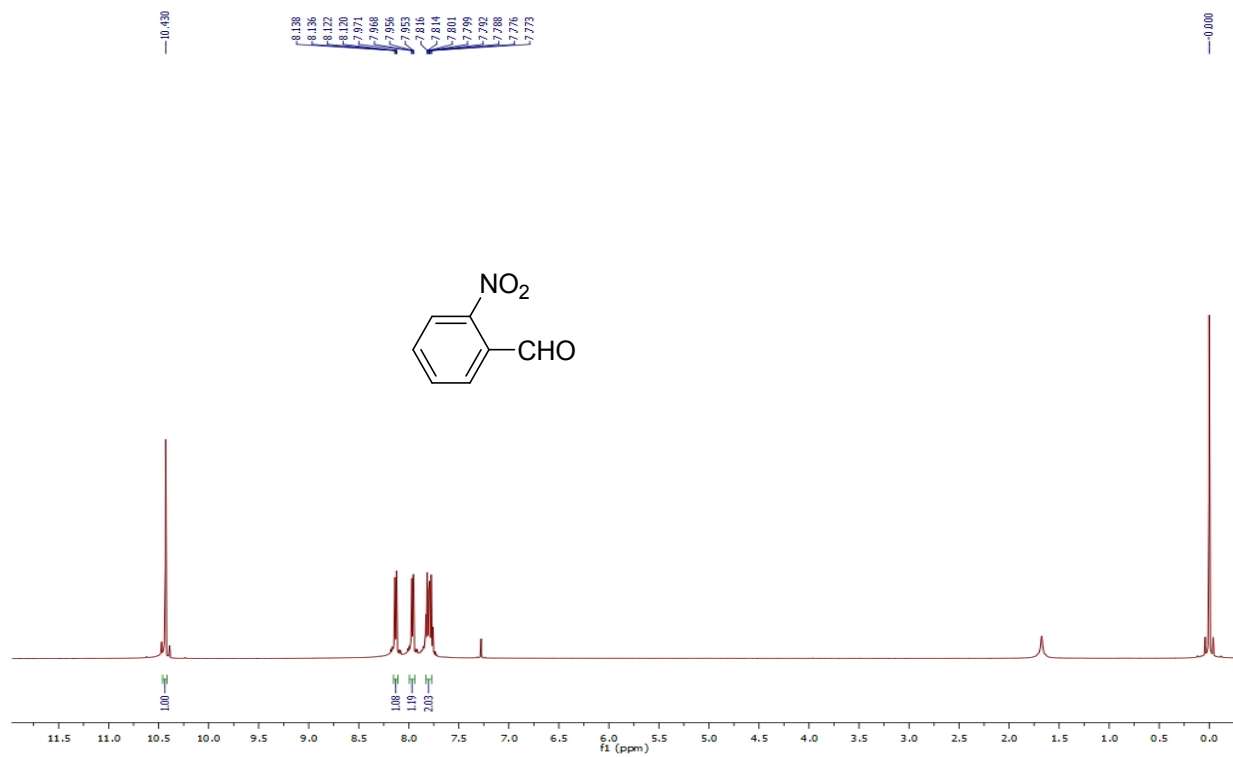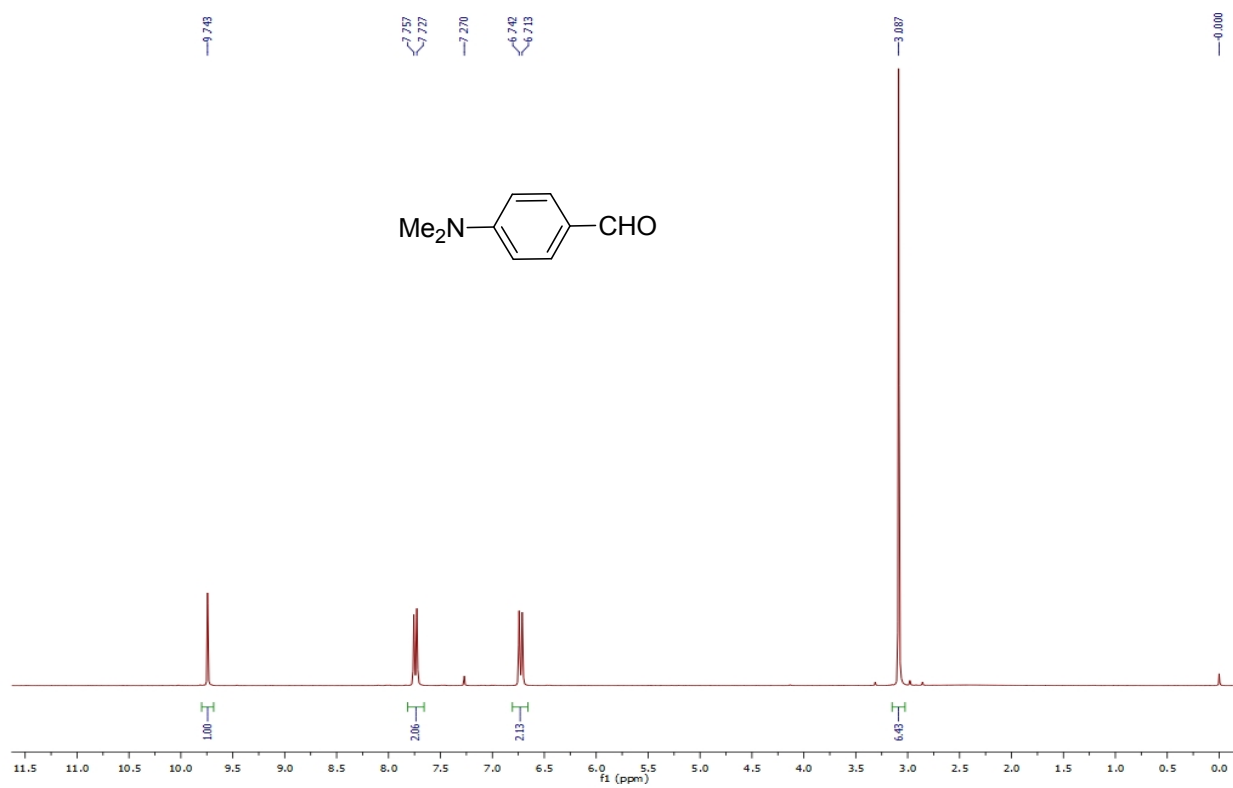

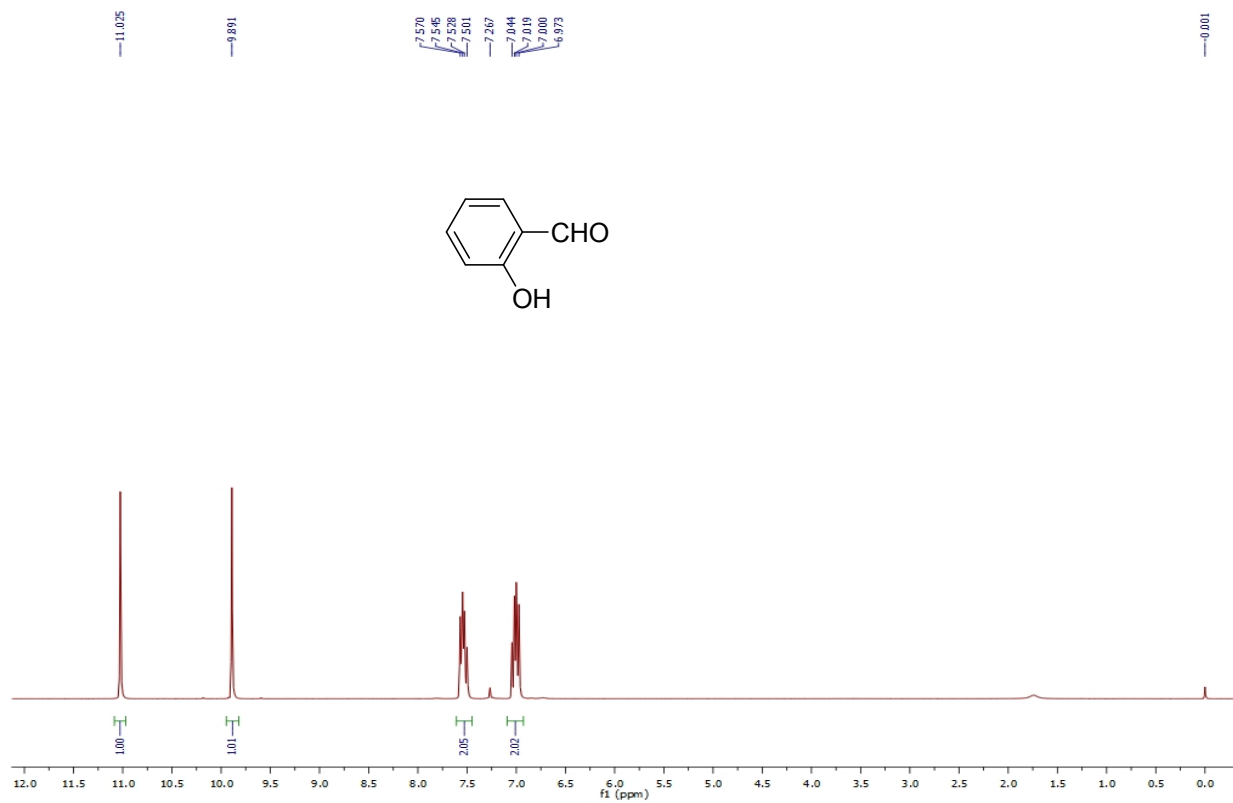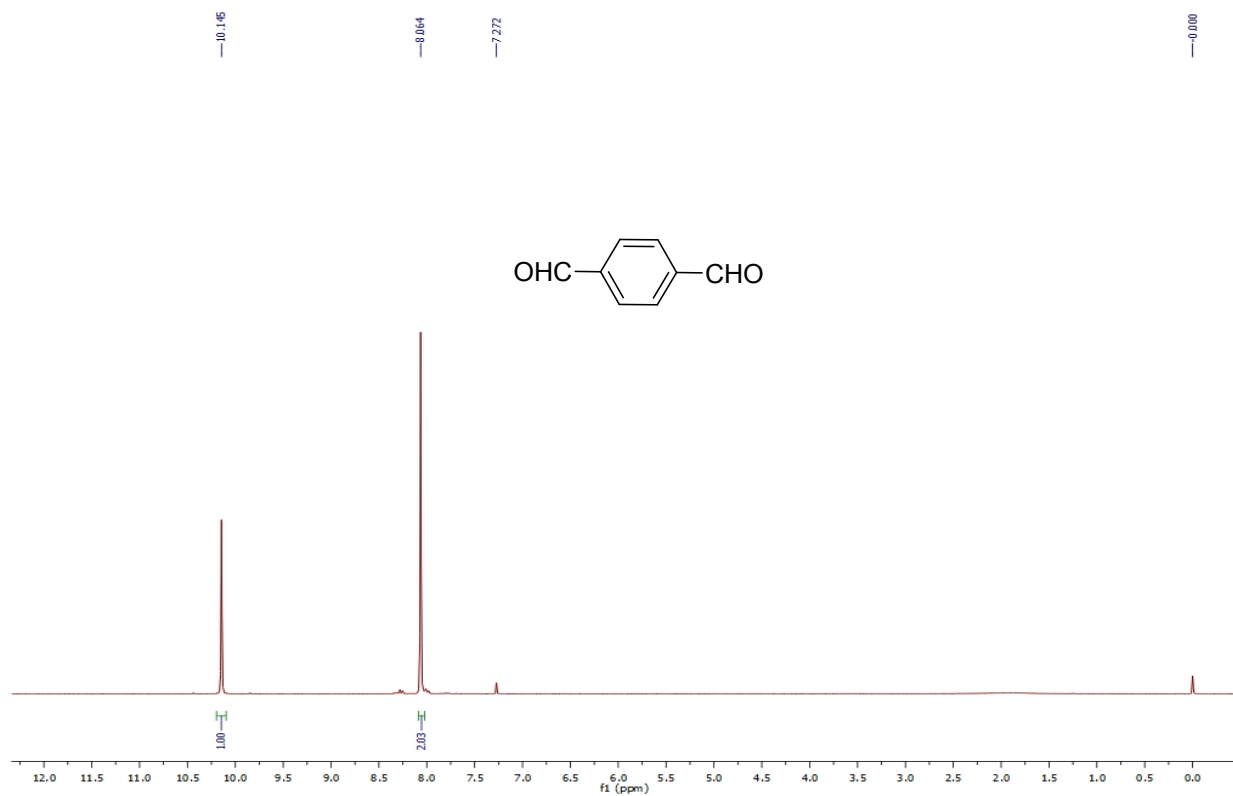

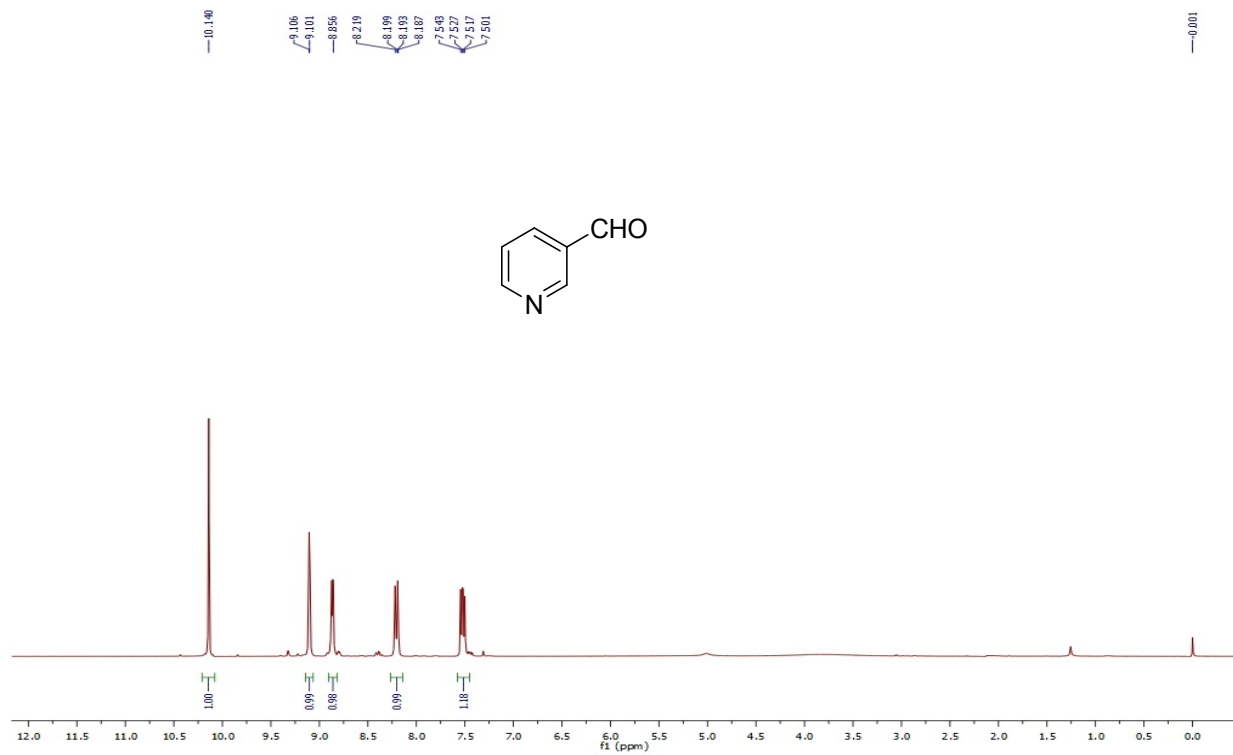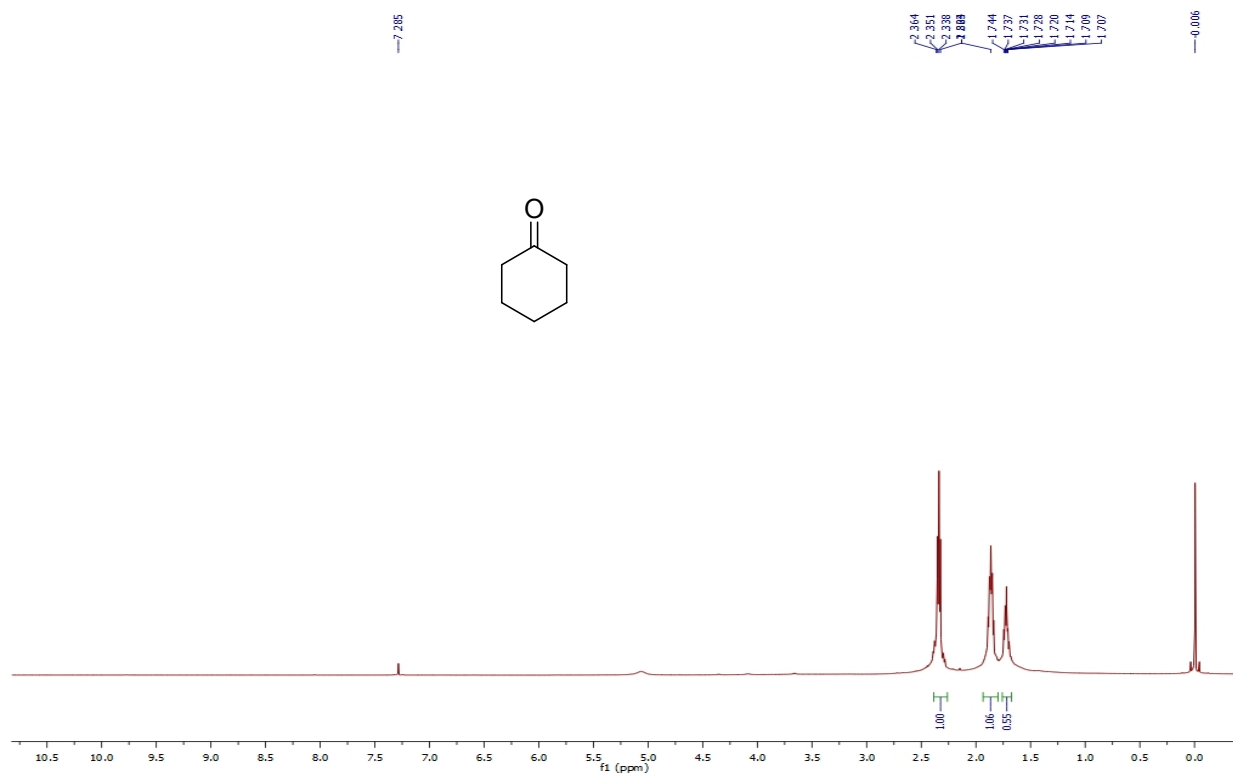

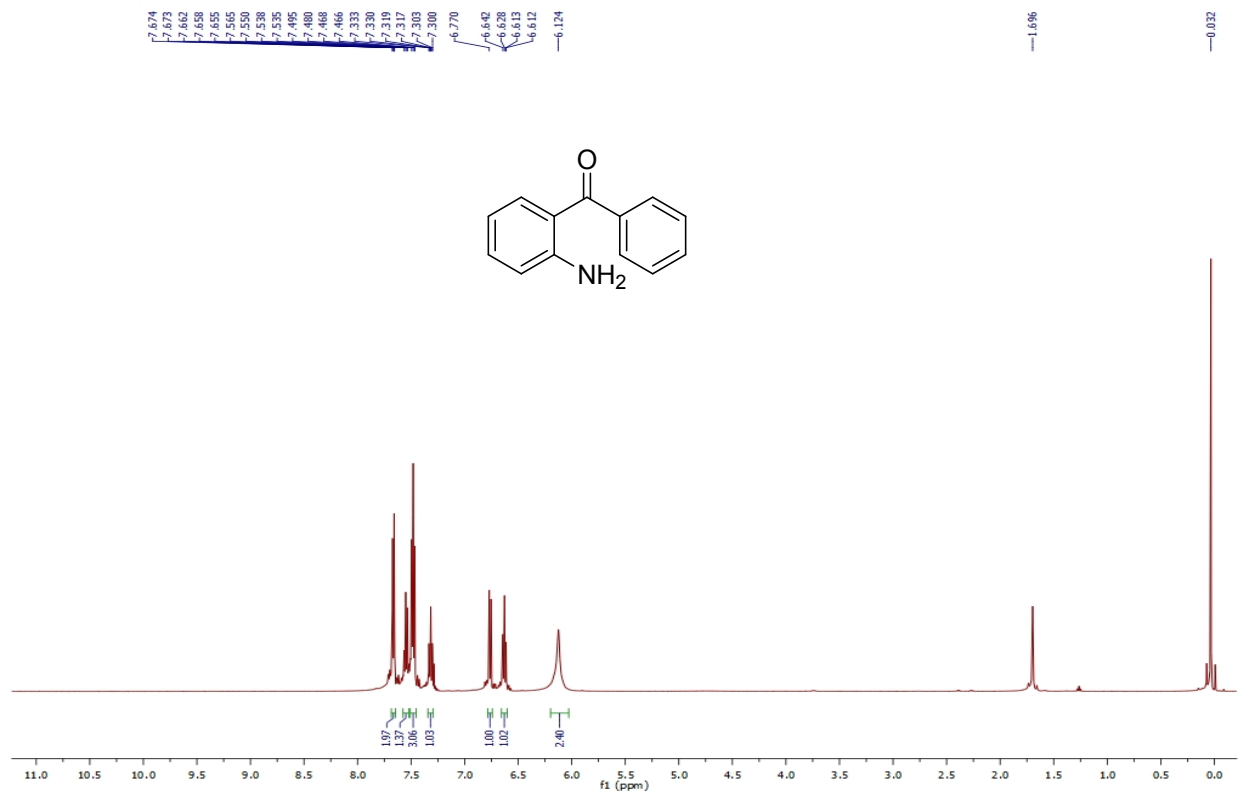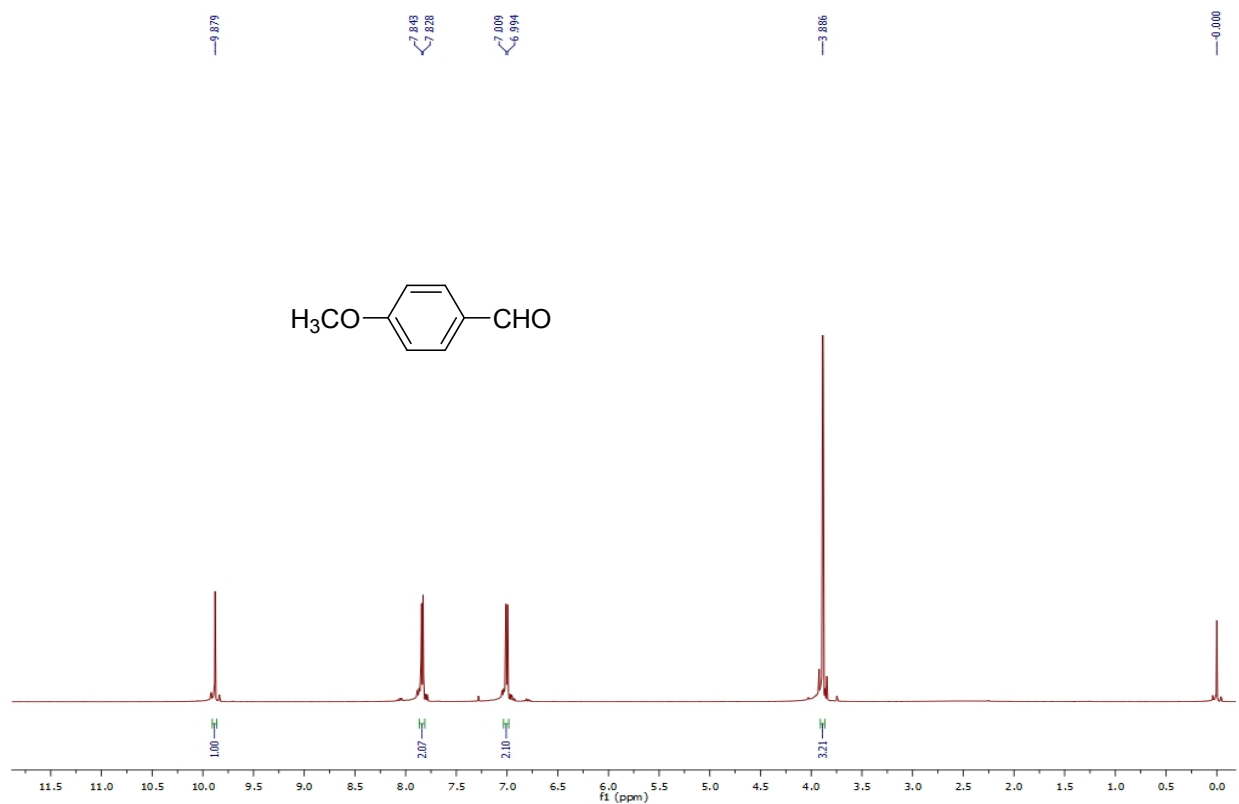

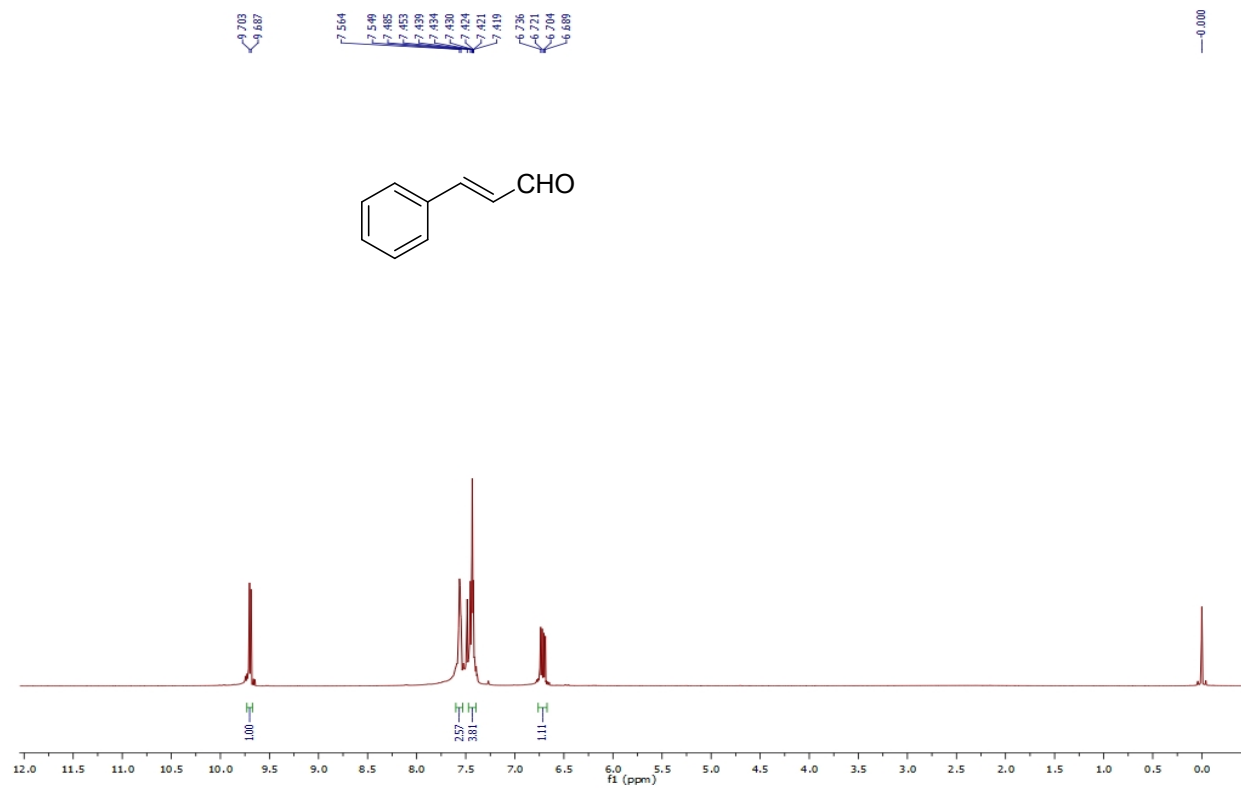



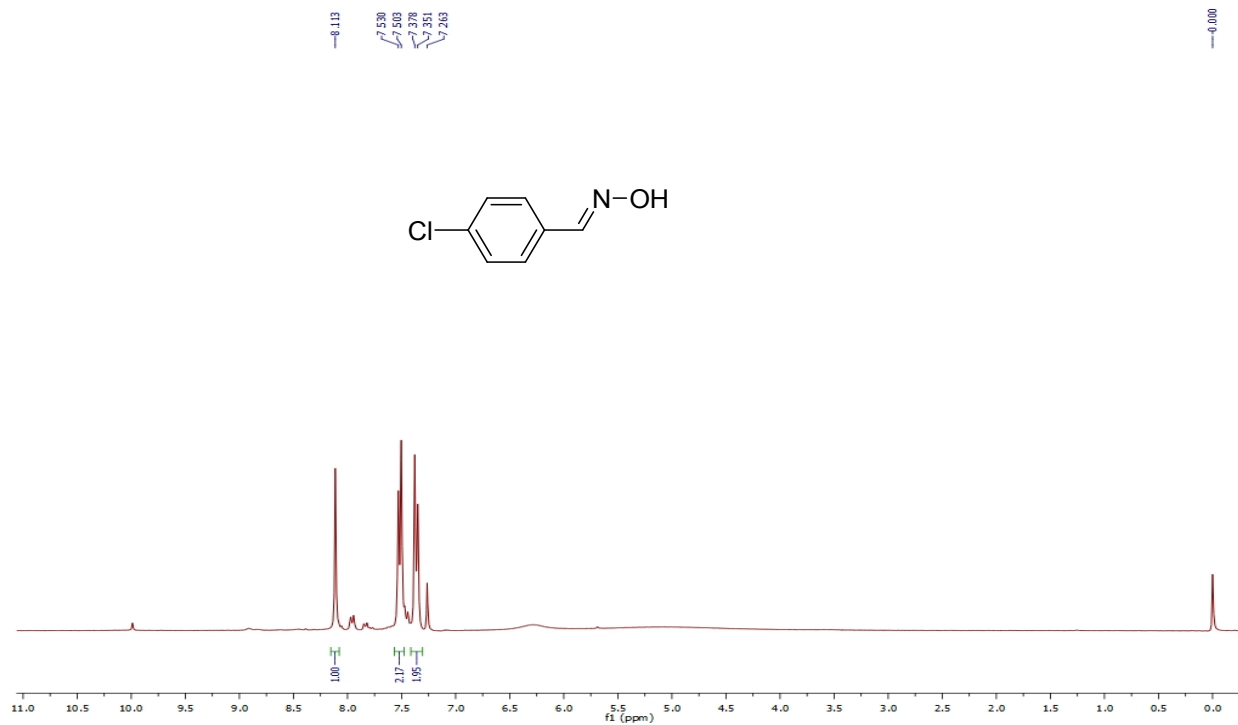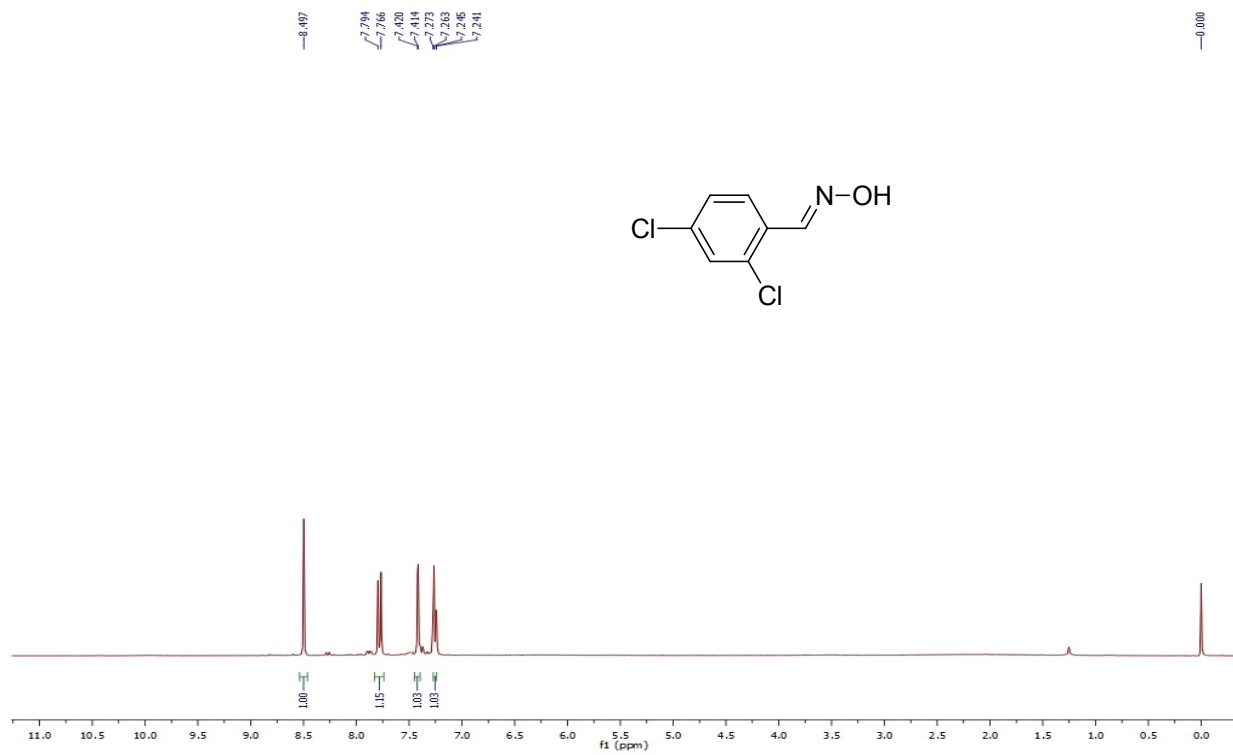

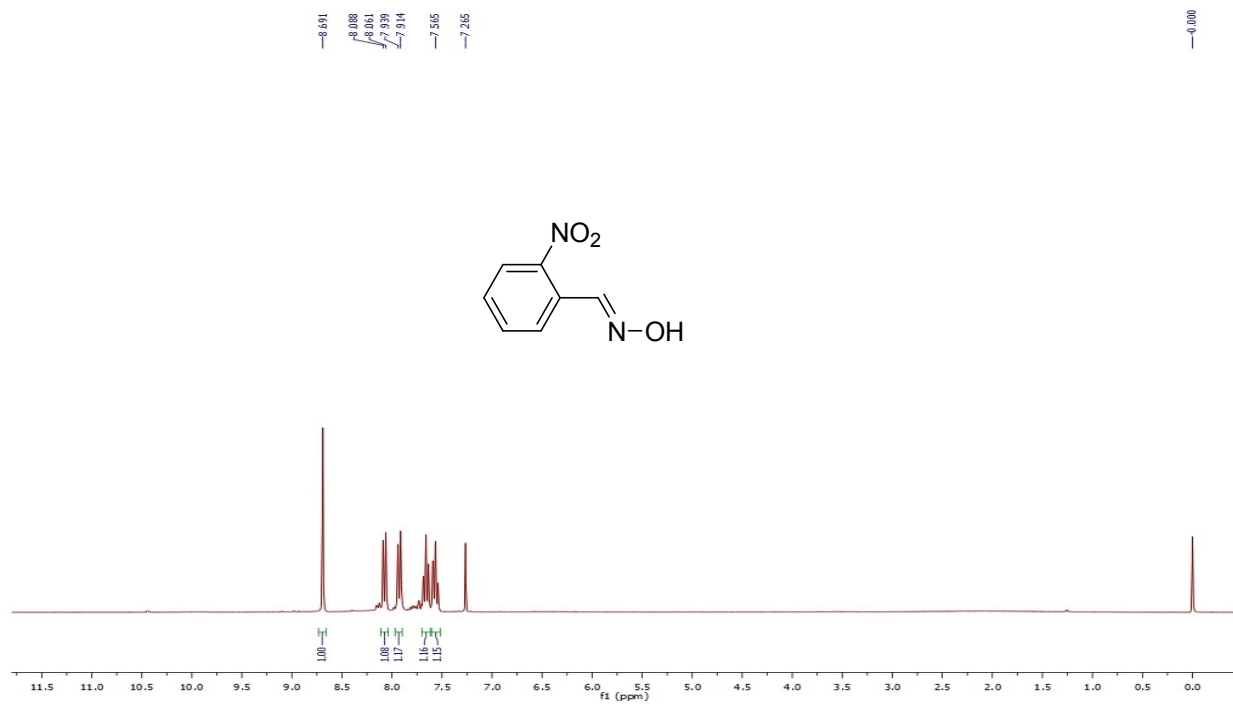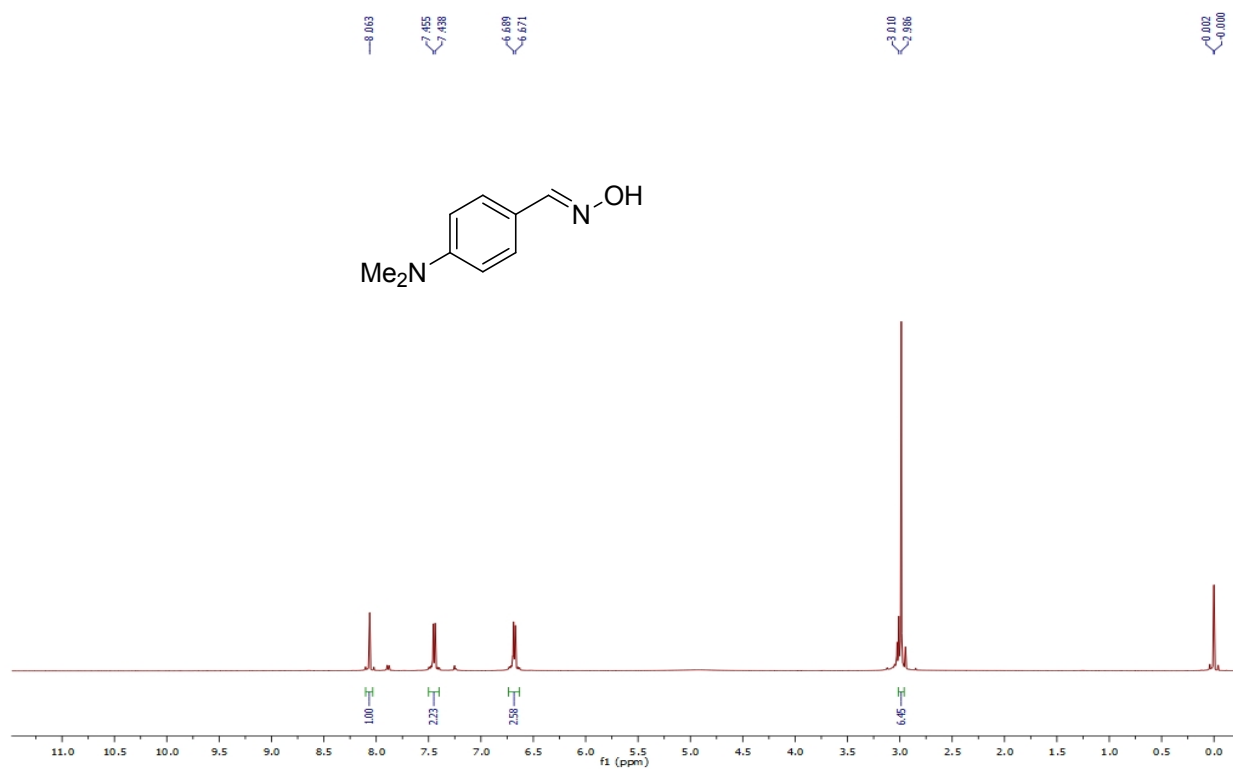

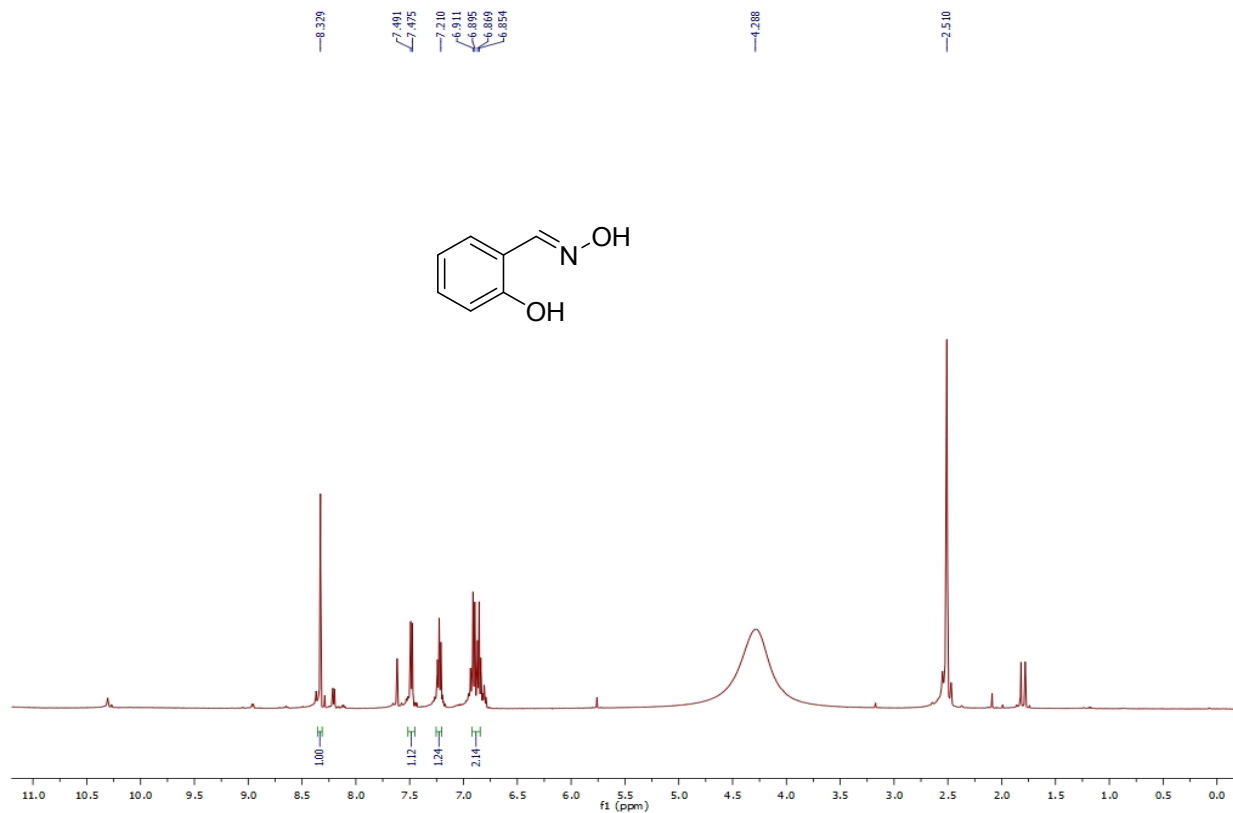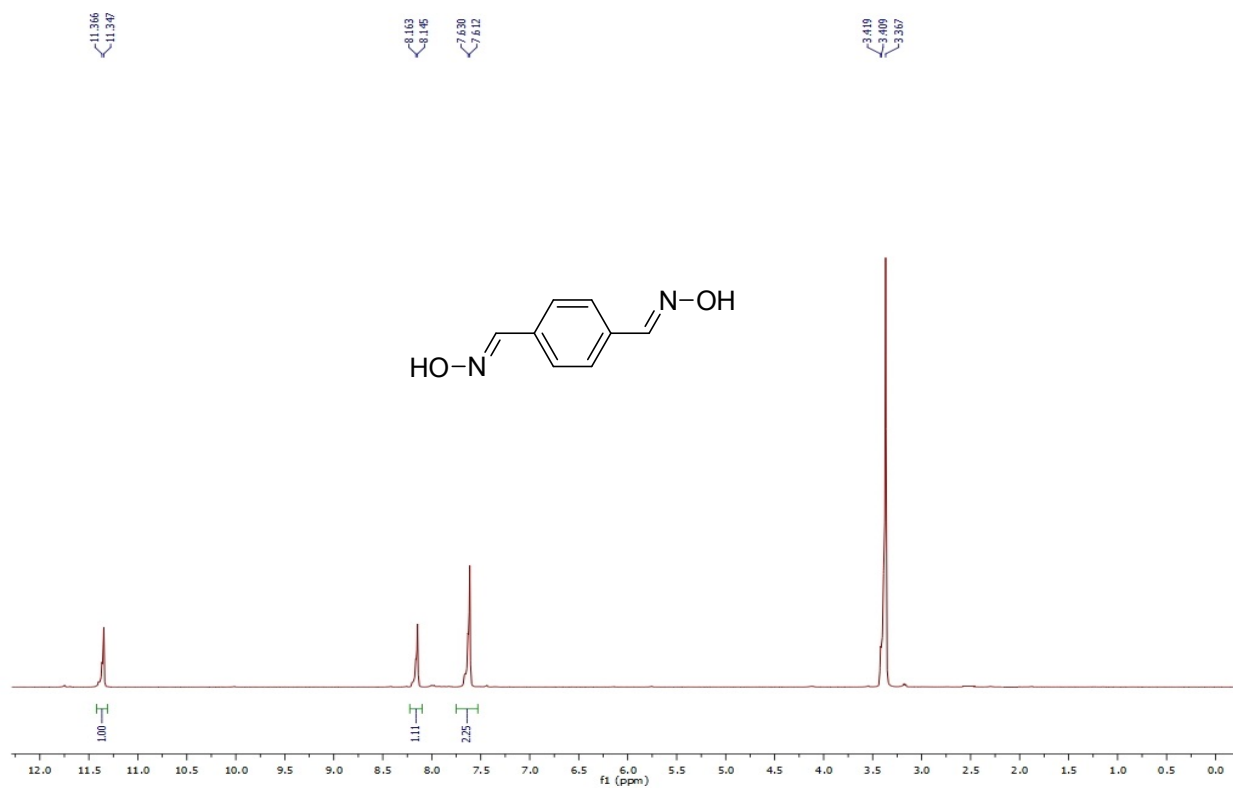

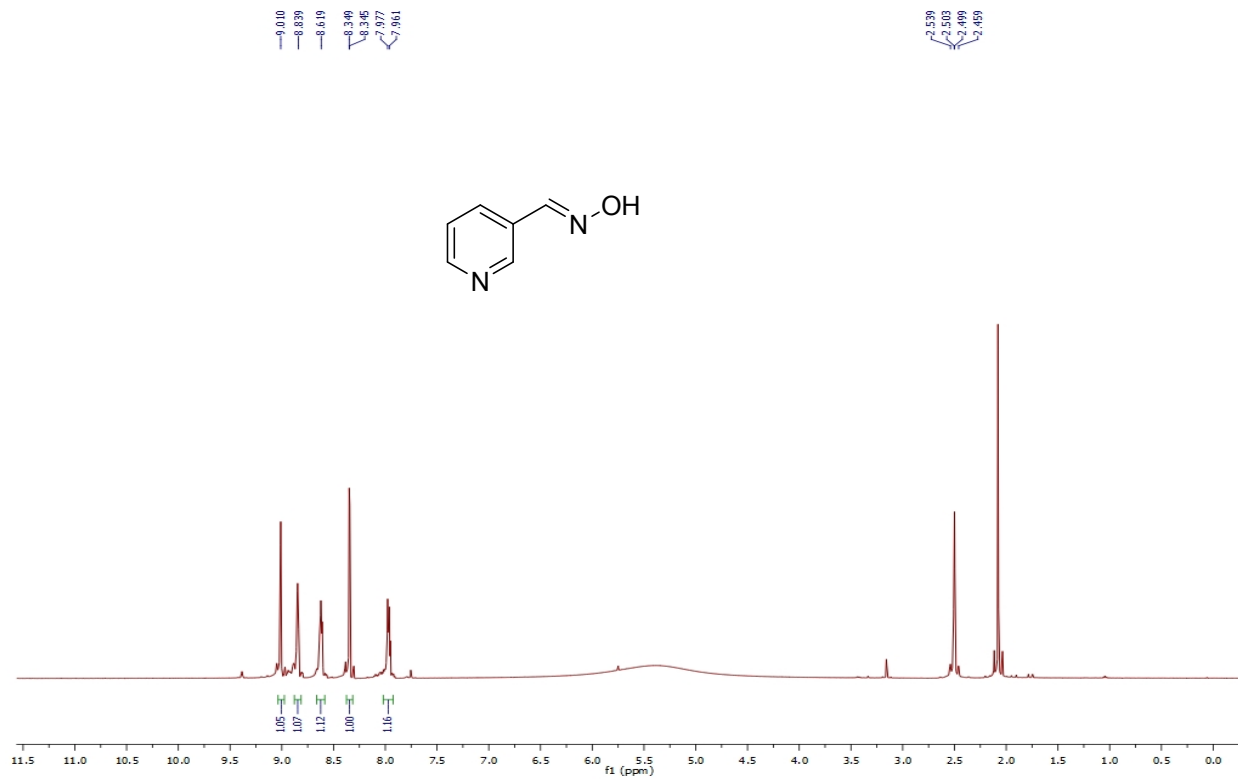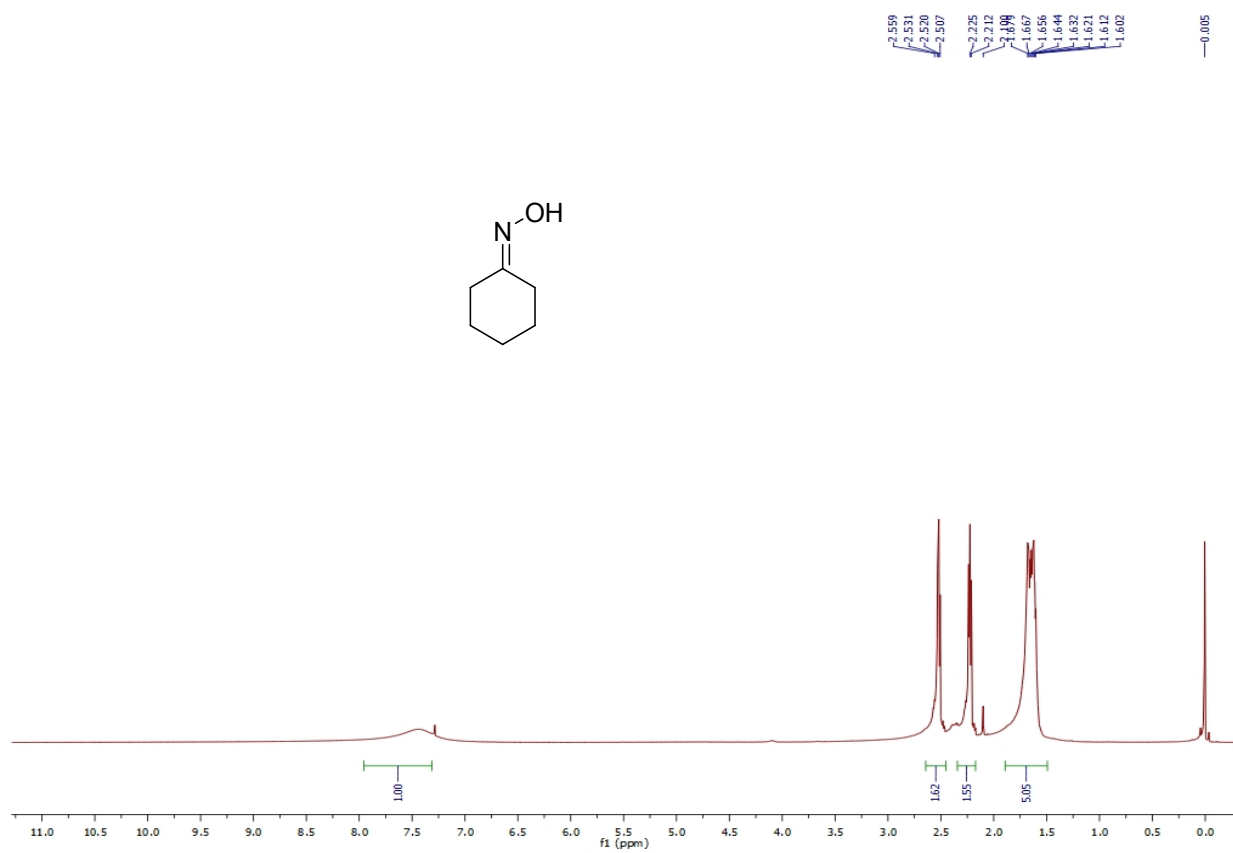

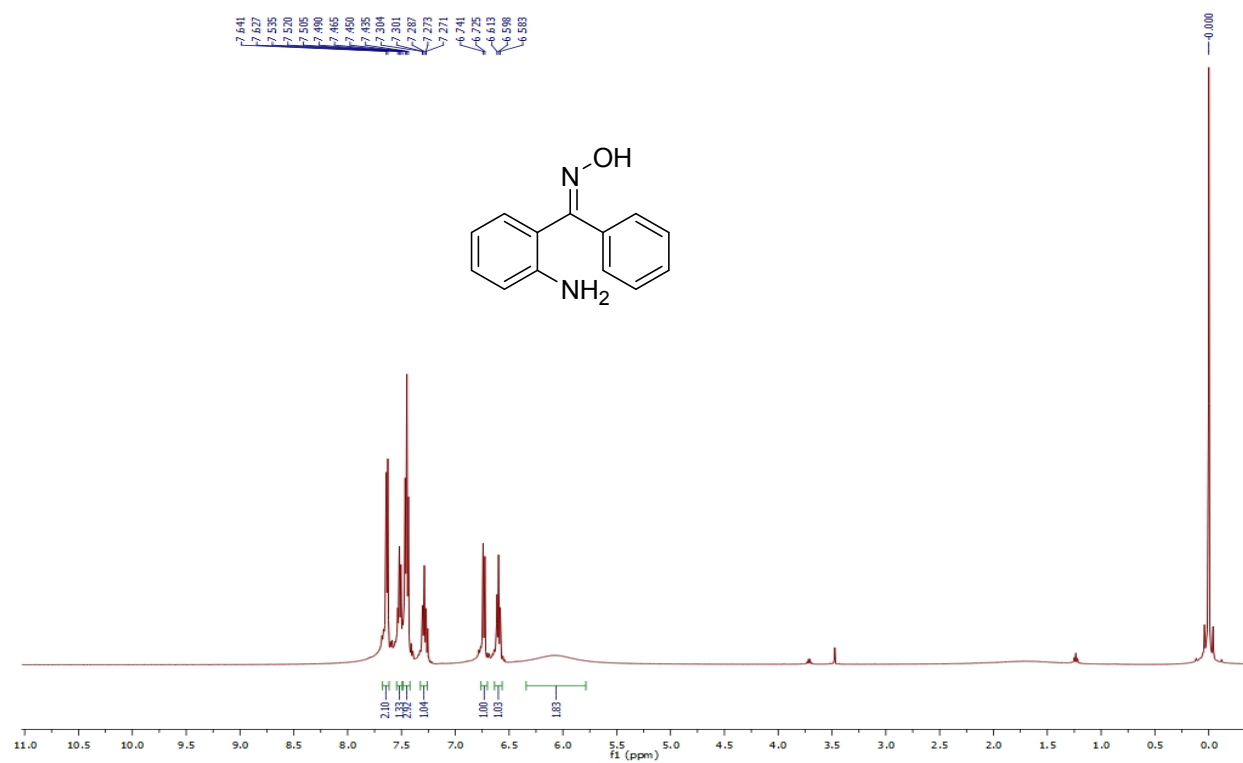

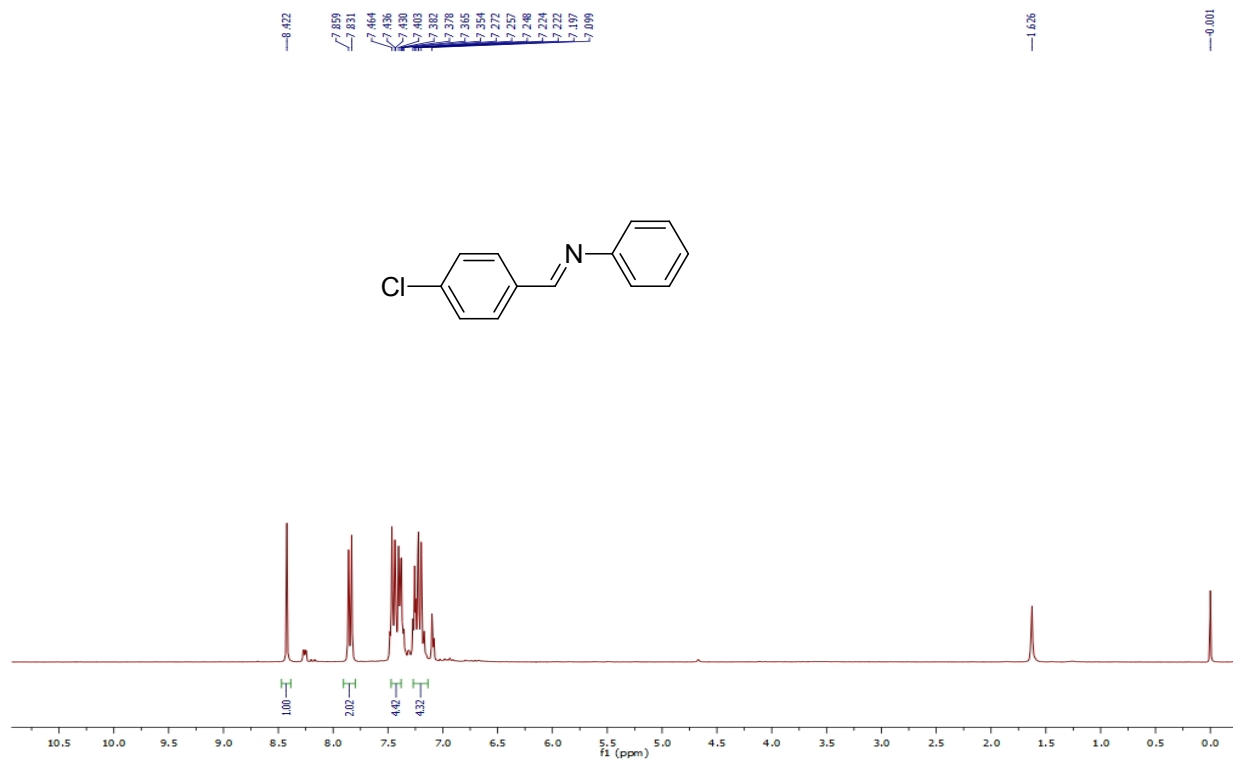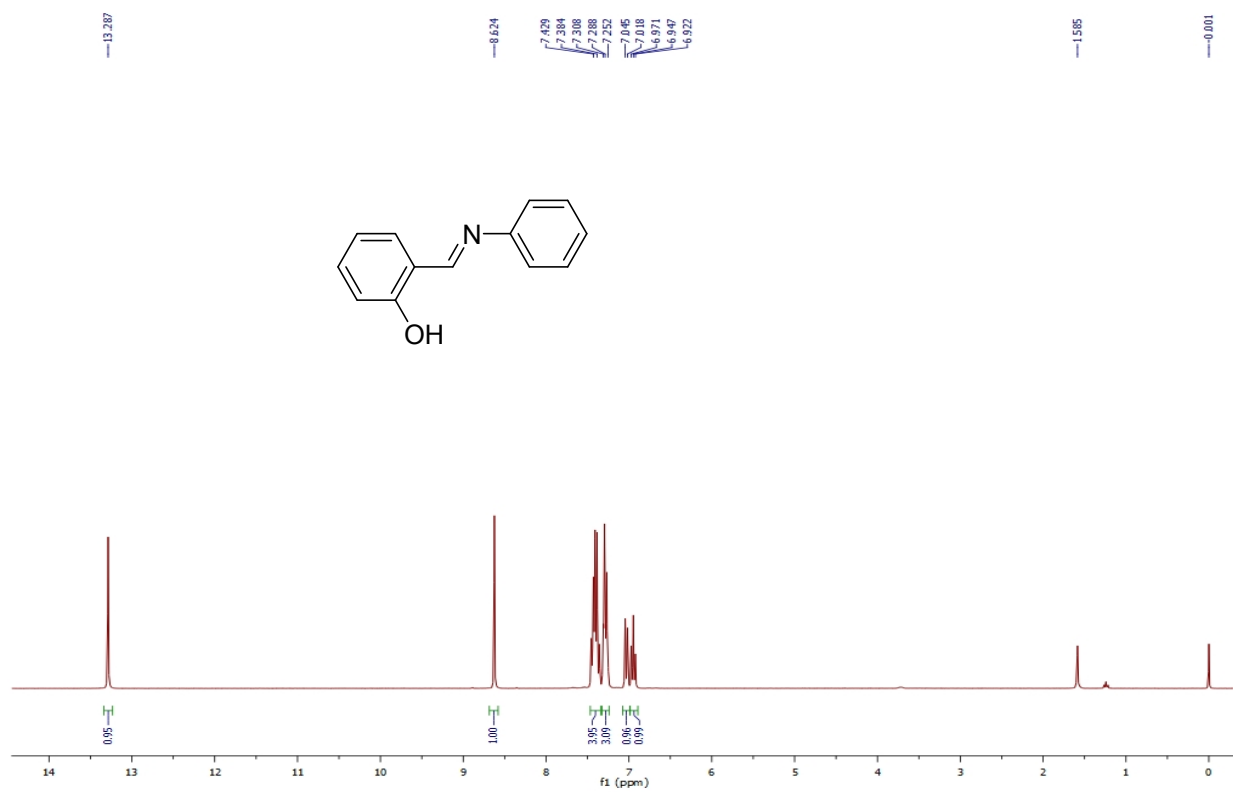

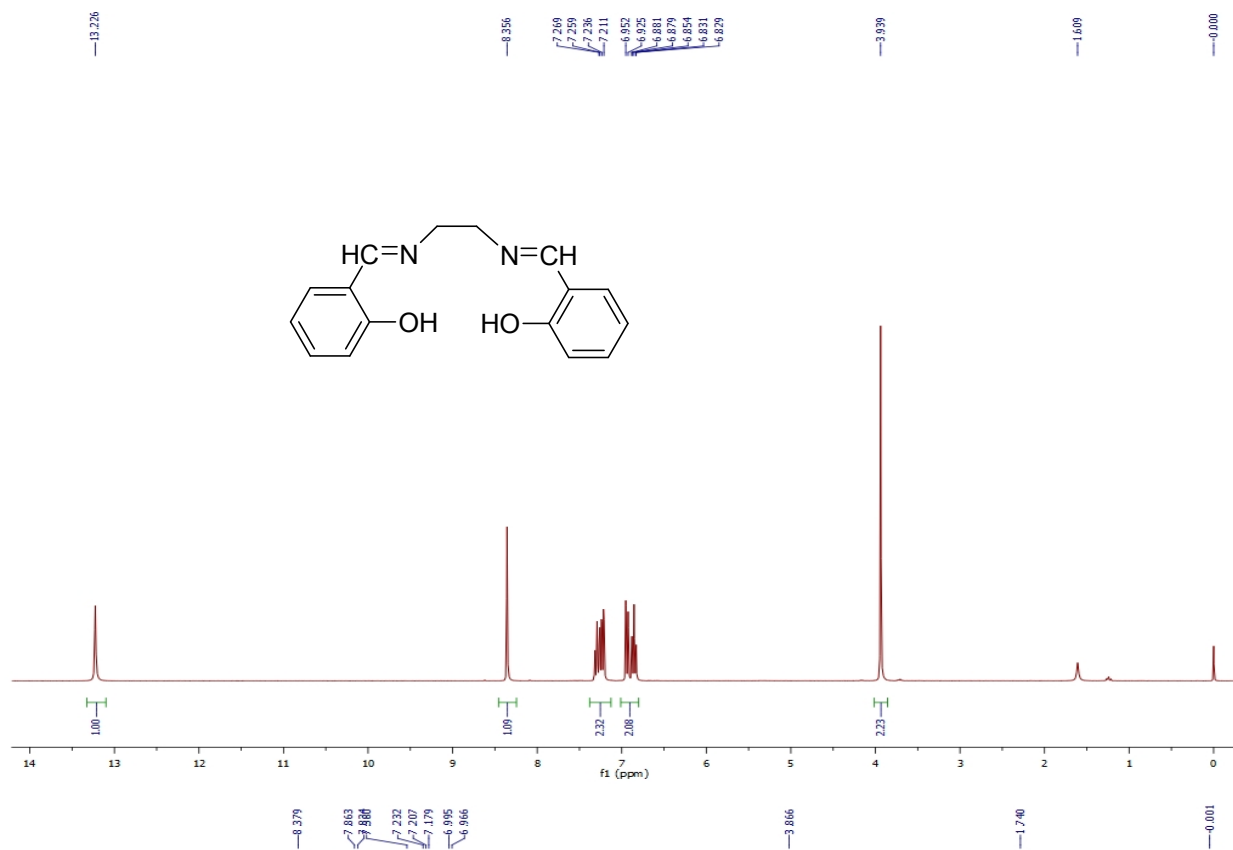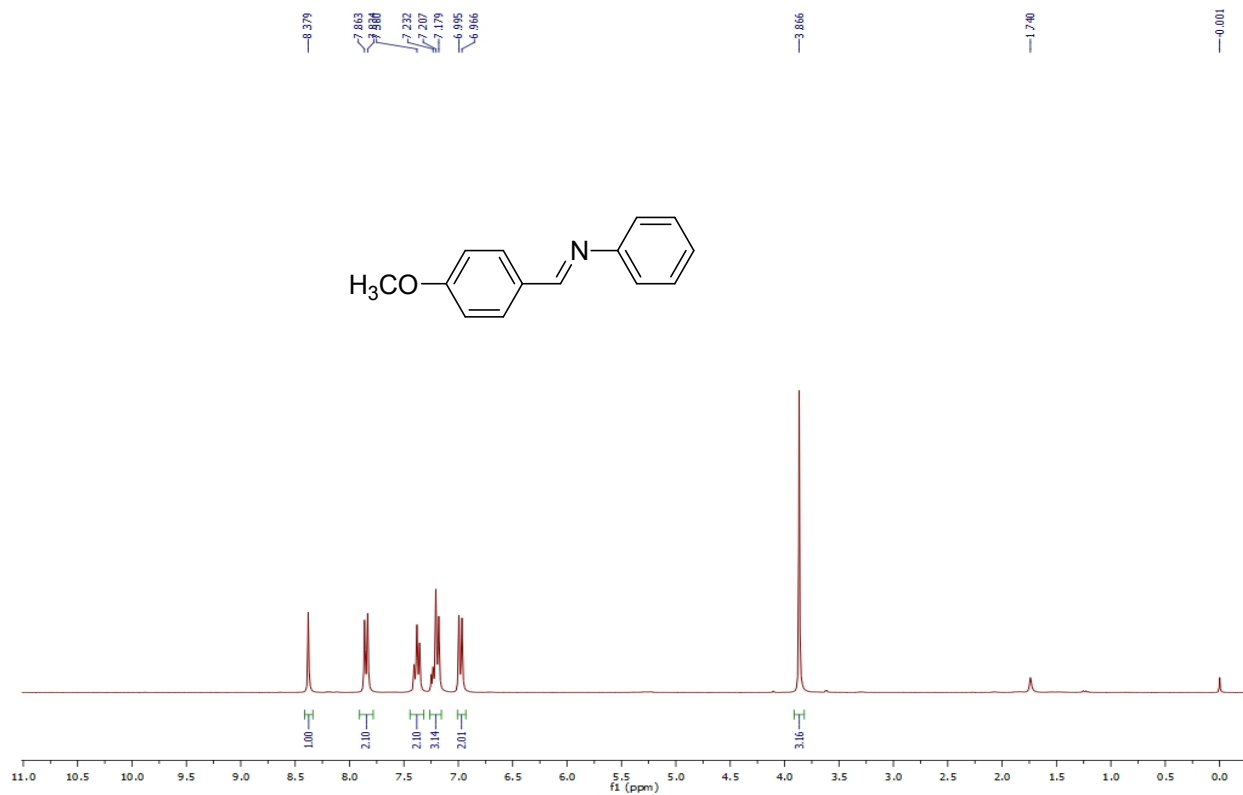

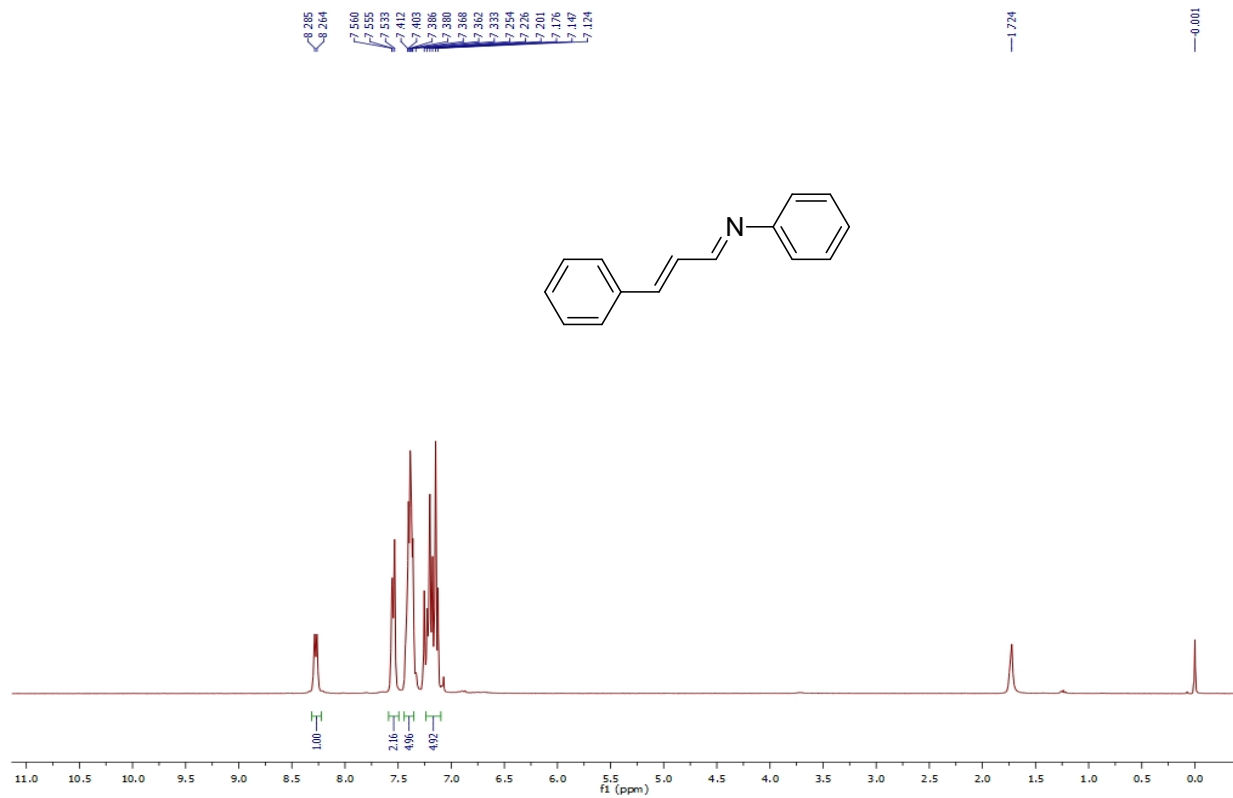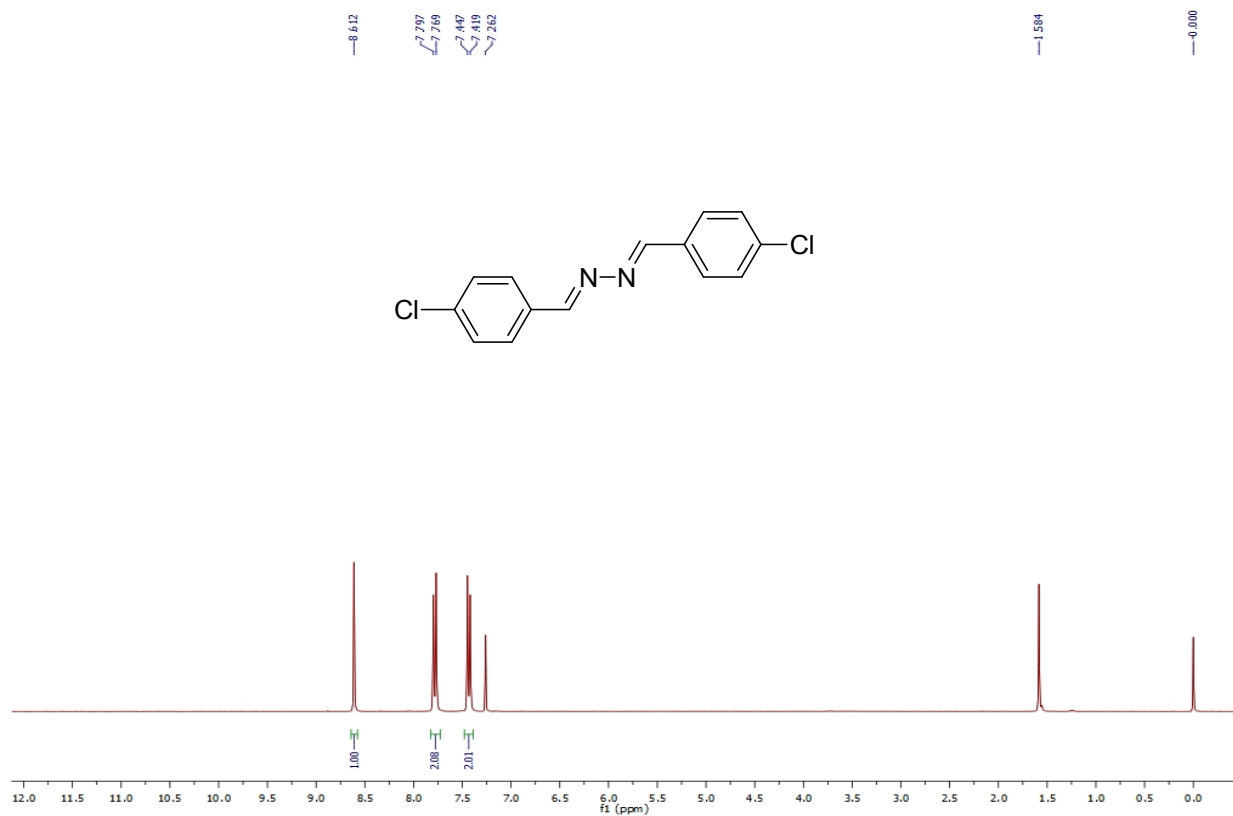



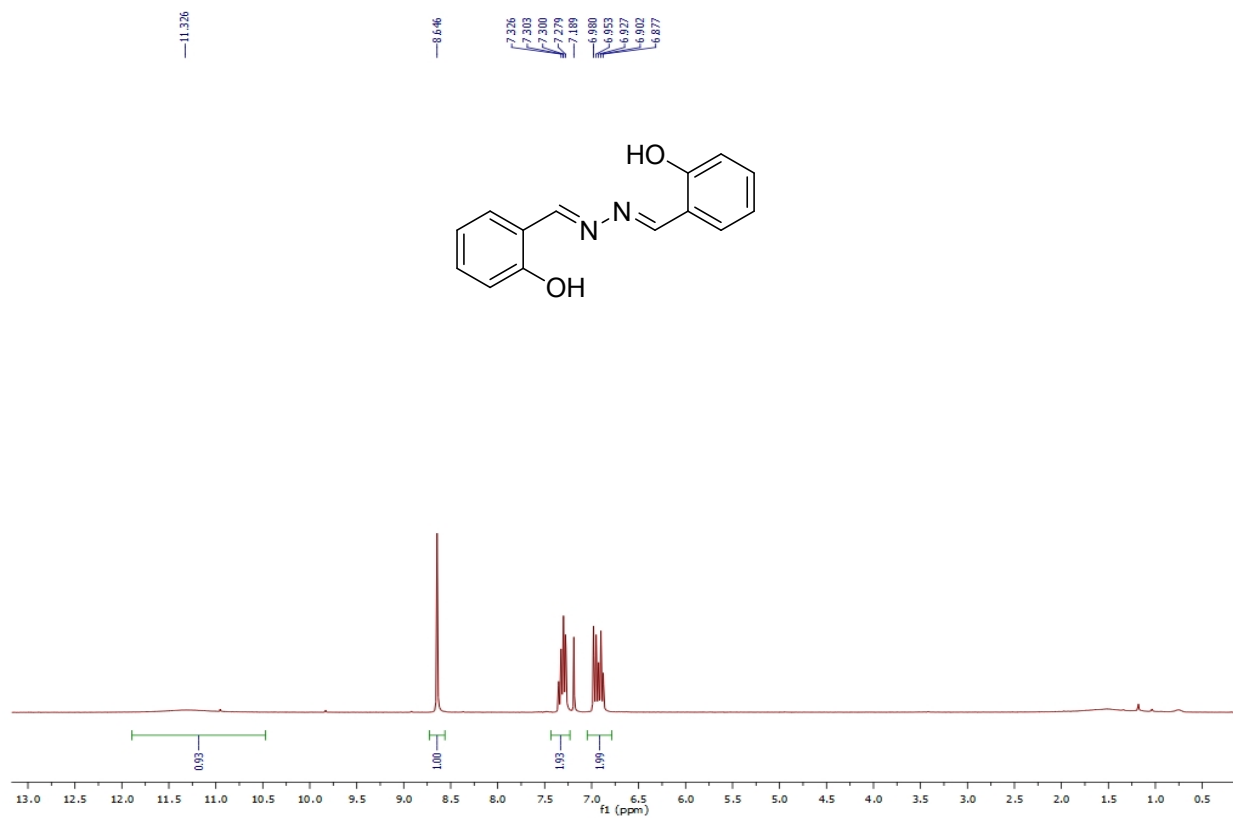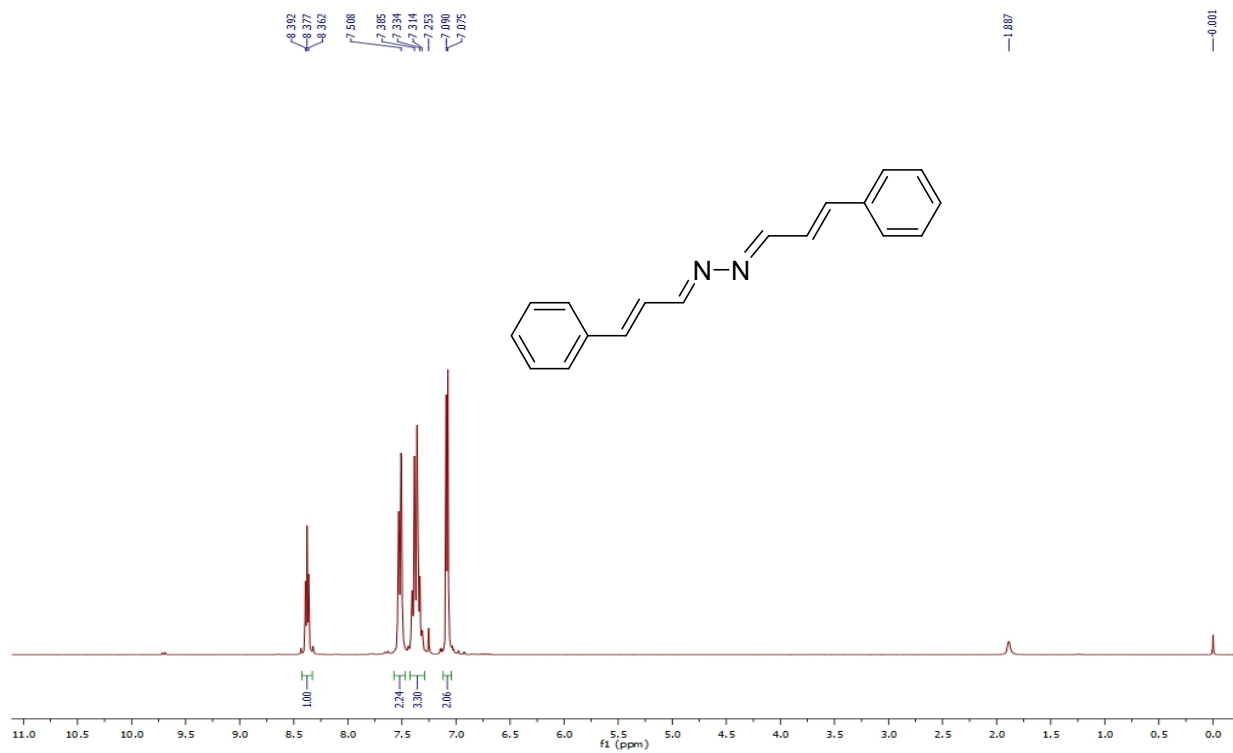

Instrument Model: Spectrum 100

Resolution: 4.0 cm<sup>-1</sup> Data Type: PE IR Spectrum

Instrument Serial Number: 80473

Software Version: Report Builder, Rev. 2.01

Date Created: Friday, September 19, 2014 10:48 AM India Standard Time

Comments: D.Baruah

Sample-P-Cl-D

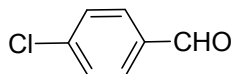

Anal. Chem. Divn., NEIST-Jorhat

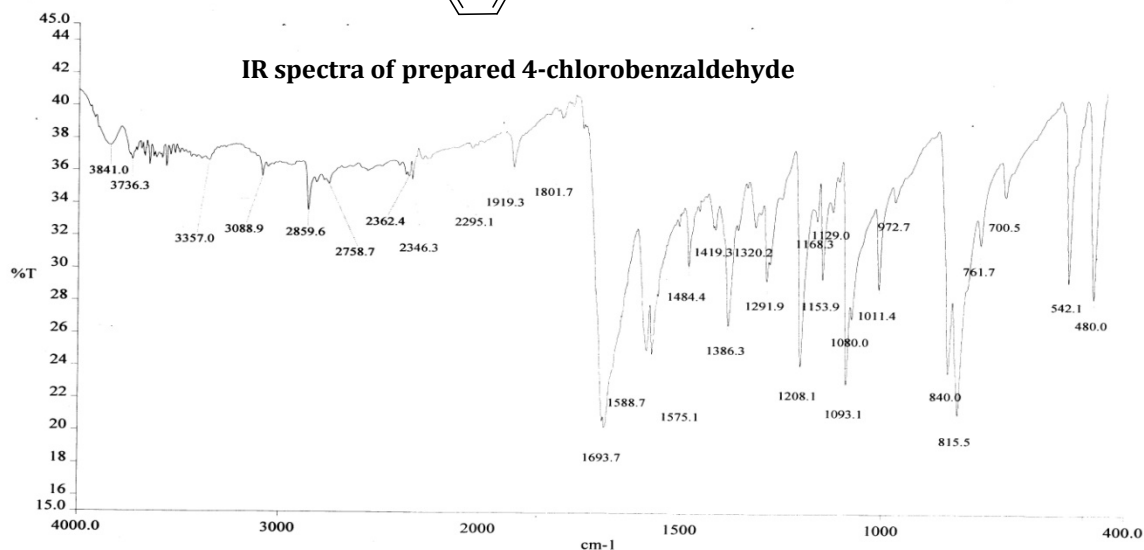

Spectrum Pathname: C:\pel\_data\spectra\ES-14-0665.002

Analyst: Ankana

Instrument Model: Spectrum 100

Resolution: 4.0 cm<sup>-1</sup> Data Type: PE IR Spectrum

Instrument Serial Number: 80473

Software Version: Report Builder, Rev. 2.01

Date Created: Thursday, July 03, 2014 9:24 AM India Standard Time

Comments: D.Baruah

Sample-JB-1

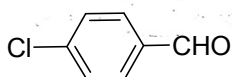

Anal. Chem. Divn., NEIST-Jorhat

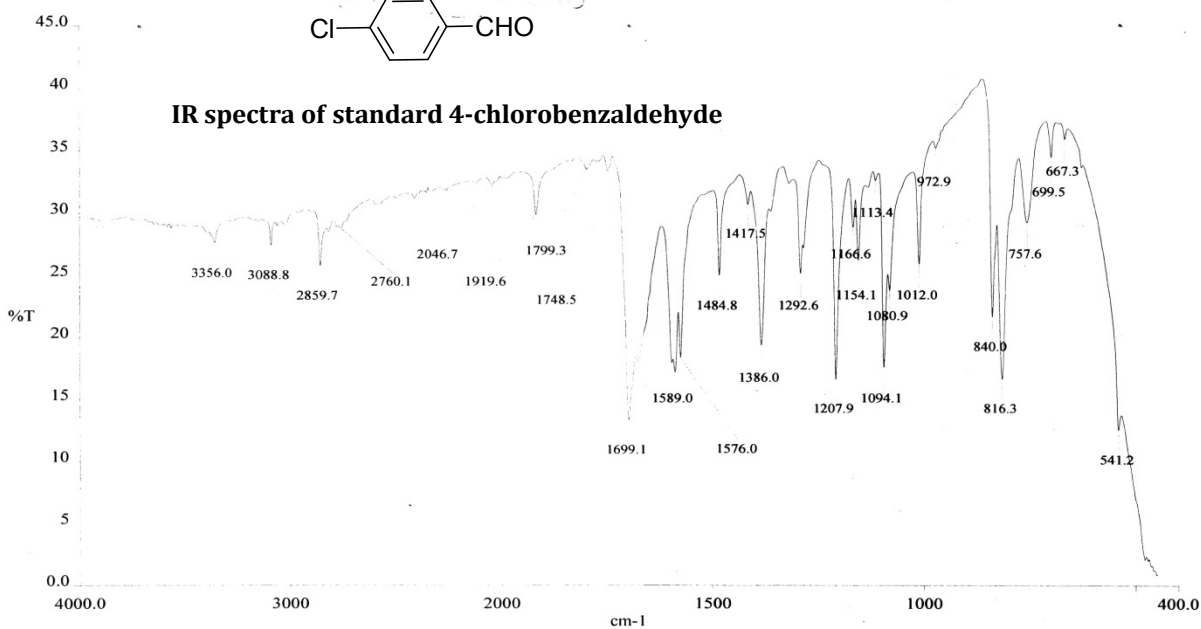

Spectrum Pathname: C:\pel\_data\spectra\ES-14-0281.001

Analyst: Ankana
